# Supplementary material
Source: publisher site journal article supplement (https://www.dovepress.com/article/541688)
Supplement: Supplementary file 1 [file 541688%20Revised%20Supplementary%20Materials.docx]

## List of Supplementary Materials

## Figure S1. Sensitivity analyses of the causal effect of frequent insomnia on psoriasis risk. A. Forest plots. B. Scatter plots. C. Funnel plot. D. The “leave-one-out” analysis.

Page 2

## Figure S2. Sensitivity analyses of the causal effect of frequent insomnia on atopic dermatitis risk. A. Forest plots. B. Scatter plots. C. Funnel plot. D. The “leave-one-out” analysis.

Page 3

## Table S1. SNPs associated with sleep traits

Page 4

## Table S2. Horizontal pleiotropy of Mendelian randomization results

Page 30

## Table S3. Heterogeneity of Mendelian randomization results

Page 32

# Figure S1


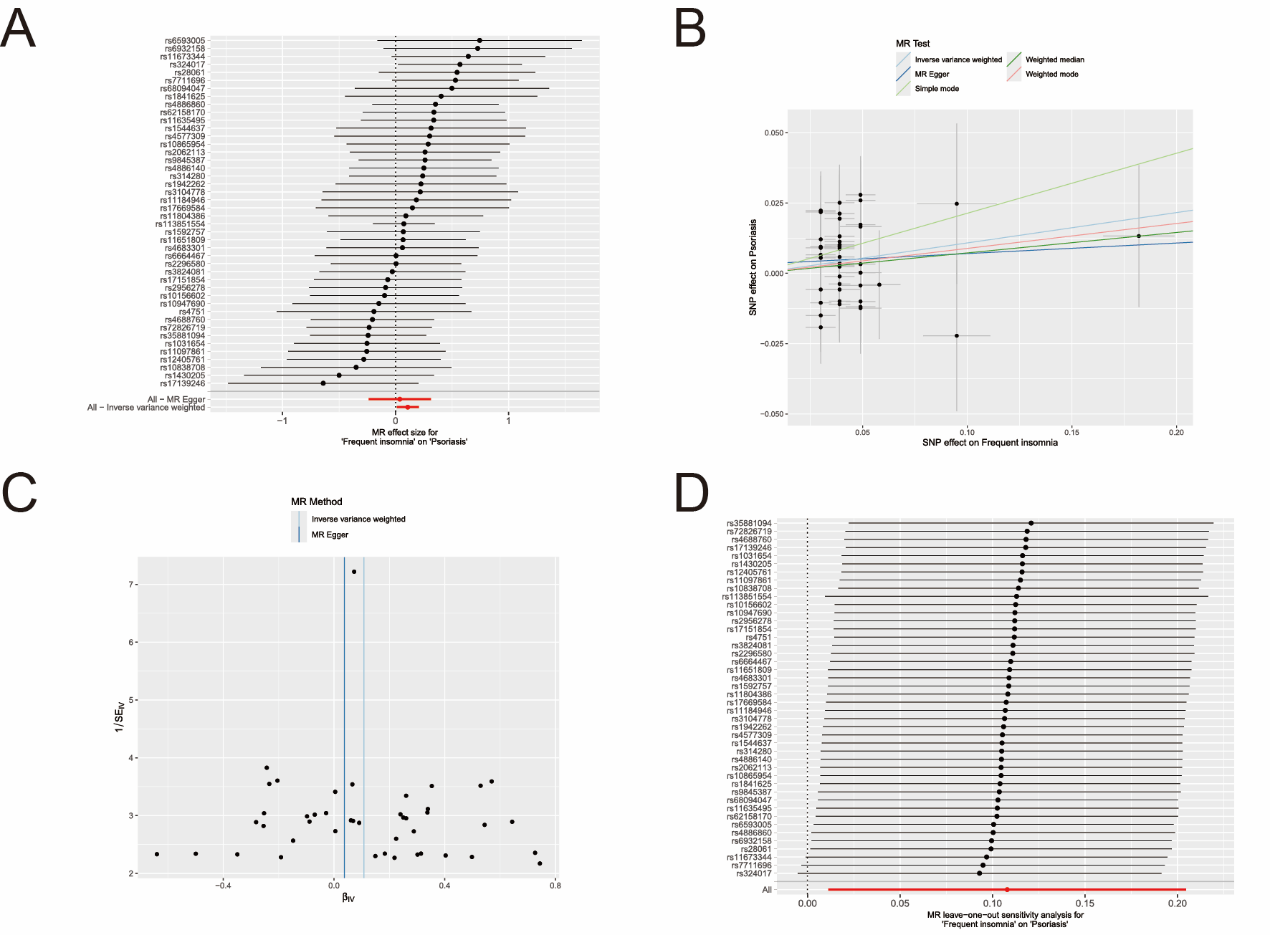


## Figure S1. Sensitivity analyses of the causal effect of frequent insomnia on psoriasis risk. A. Forest plots. B. Scatter plots. C. Funnel plot. D. The “leave-one-out” analysis.

# Figure S2


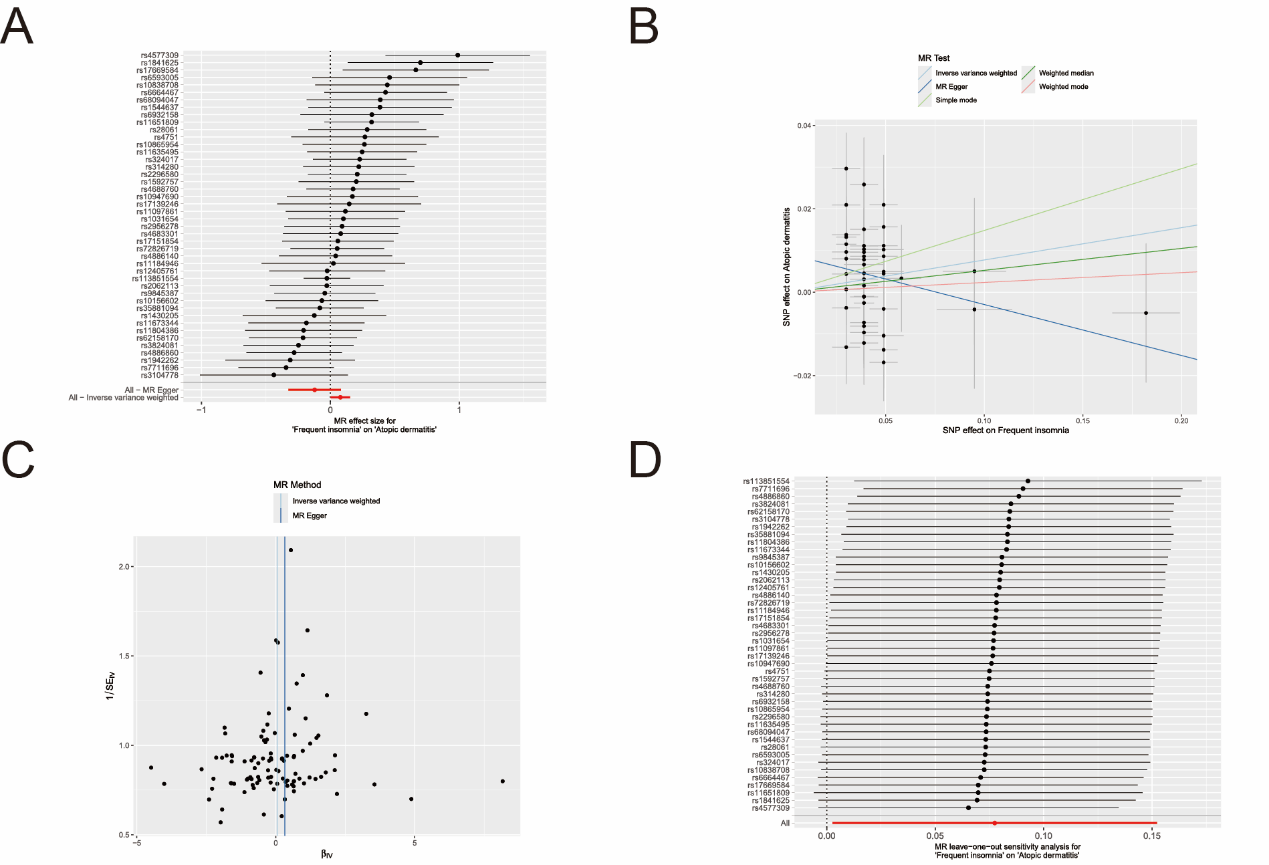


## Figure S2. Sensitivity analyses of the causal effect of frequent insomnia on atopic dermatitis risk. A. Forest plots. B. Scatter plots. C. Funnel plot. D. The “leave-one-out” analysis.

# Table S1. SNPs associated with sleep traits

| **exposure** | **SNP** | **effect_allele** | **other_allele** | **eaf** | **beta** | **se** | **pval** | **samplesize** | **R2** | **F** |
| --- | --- | --- | --- | --- | --- | --- | --- | --- | --- | --- |
| Sleep duration | rs10173260 | C | T | 0.606 | 0.77 | 0.139 | 2.90E-08 | 446118 | 6.88E-05 | 30.68667988 |
| Sleep duration | rs10421649 | A | T | 0.557 | 0.798 | 0.138 | 6.90E-09 | 446118 | 7.49E-05 | 33.43841342 |
| Sleep duration | rs10483350 | G | A | 0.195 | 1.042 | 0.172 | 1.50E-09 | 446118 | 8.23E-05 | 36.70089009 |
| Sleep duration | rs1057703 | G | T | 0.147 | 1.164 | 0.192 | 1.10E-09 | 446118 | 8.24E-05 | 36.75374148 |
| Sleep duration | rs10761674 | C | T | 0.477 | 0.74 | 0.136 | 4.20E-08 | 446118 | 6.64E-05 | 29.60626866 |
| Sleep duration | rs10973207 | T | G | 0.158 | 1.226 | 0.187 | 6.00E-11 | 446118 | 9.63E-05 | 42.98290662 |
| Sleep duration | rs11190970 | G | A | 0.799 | 0.923 | 0.169 | 4.60E-08 | 446118 | 6.69E-05 | 29.82826864 |
| Sleep duration | rs112230981 | A | G | 0.95 | 1.892 | 0.314 | 2.20E-09 | 446118 | 8.14E-05 | 36.30621883 |
| Sleep duration | rs113113059 | T | C | 0.78 | 0.968 | 0.164 | 8.40E-09 | 446118 | 7.81E-05 | 34.83863025 |
| Sleep duration | rs11567976 | T | C | 0.571 | 0.768 | 0.137 | 2.10E-08 | 446118 | 7.04E-05 | 31.42529467 |
| Sleep duration | rs11602180 | C | T | 0.837 | 1.095 | 0.184 | 2.30E-09 | 446118 | 7.94E-05 | 35.41527719 |
| Sleep duration | rs11614986 | A | G | 0.821 | 0.983 | 0.177 | 2.70E-08 | 446118 | 6.91E-05 | 30.84313792 |
| Sleep duration | rs11621908 | C | T | 0.917 | 1.446 | 0.25 | 5.60E-09 | 446118 | 7.50E-05 | 33.45450602 |
| Sleep duration | rs11643715 | G | C | 0.291 | 0.834 | 0.15 | 3.20E-08 | 446118 | 6.93E-05 | 30.91346141 |
| Sleep duration | rs11885663 | T | C | 0.248 | 0.973 | 0.157 | 8.60E-10 | 446118 | 8.61E-05 | 38.40824194 |
| Sleep duration | rs12246842 | A | G | 0.46 | 0.804 | 0.136 | 3.90E-09 | 446118 | 7.83E-05 | 34.94880526 |
| Sleep duration | rs12567114 | A | G | 0.276 | 0.89 | 0.152 | 4.30E-09 | 446118 | 7.68E-05 | 34.28395295 |
| Sleep duration | rs12607679 | T | C | 0.738 | 1.208 | 0.156 | 8.30E-15 | 446118 | 0.000134393 | 59.96291329 |
| Sleep duration | rs12611523 | A | G | 0.545 | 0.758 | 0.137 | 3.10E-08 | 446118 | 6.86E-05 | 30.61225554 |
| Sleep duration | rs1263056 | A | G | 0.519 | 0.768 | 0.137 | 2.00E-08 | 446118 | 7.04E-05 | 31.42529467 |
| Sleep duration | rs12791153 | T | A | 0.081 | 1.413 | 0.253 | 1.90E-08 | 446118 | 6.99E-05 | 31.19186441 |
| Sleep duration | rs13088093 | G | T | 0.336 | 0.976 | 0.144 | 7.00E-12 | 446118 | 0.000102963 | 45.93806566 |
| Sleep duration | rs13109404 | T | G | 0.928 | 1.872 | 0.264 | 1.40E-12 | 446118 | 0.000112695 | 50.28076632 |
| Sleep duration | rs151014368 | A | G | 0.206 | 0.966 | 0.169 | 9.10E-09 | 446118 | 7.32E-05 | 32.67223895 |
| Sleep duration | rs1517572 | C | A | 0.581 | 0.879 | 0.138 | 1.50E-10 | 446118 | 9.09E-05 | 40.57117917 |
| Sleep duration | rs1553132 | G | A | 0.258 | 0.87 | 0.155 | 2.50E-08 | 446118 | 7.06E-05 | 31.50454138 |
| Sleep duration | rs17427571 | A | G | 0.684 | 0.83 | 0.146 | 1.30E-08 | 446118 | 7.24E-05 | 32.31830135 |
| Sleep duration | rs174560 | C | T | 0.314 | 0.815 | 0.146 | 2.80E-08 | 446118 | 6.98E-05 | 31.16072538 |
| Sleep duration | rs17732997 | C | G | 0.569 | 0.776 | 0.137 | 1.20E-08 | 446118 | 7.19E-05 | 32.08339818 |
| Sleep duration | rs1776776 | T | C | 0.874 | 1.198 | 0.205 | 4.90E-09 | 446118 | 7.65E-05 | 34.15104261 |
| Sleep duration | rs180769 | T | C | 0.425 | 0.763 | 0.138 | 2.30E-08 | 446118 | 6.85E-05 | 30.56954369 |
| Sleep duration | rs1939455 | G | T | 0.879 | 1.226 | 0.214 | 1.20E-08 | 446118 | 7.36E-05 | 32.82097261 |
| Sleep duration | rs1991556 | G | A | 0.774 | 0.994 | 0.1634238 | 1.00E-09 | 446118 | 8.29E-05 | 36.99475985 |
| Sleep duration | rs205024 | T | C | 0.384 | 0.83 | 0.14 | 3.90E-09 | 446118 | 7.88E-05 | 35.14780161 |
| Sleep duration | rs2072727 | T | C | 0.436 | 0.795 | 0.137 | 7.90E-09 | 446118 | 7.55E-05 | 33.67372617 |
| Sleep duration | rs2079070 | C | G | 0.265 | 1.053 | 0.154 | 7.50E-12 | 446118 | 0.00010479 | 46.75341664 |
| Sleep duration | rs2139261 | G | C | 0.749 | 1.122 | 0.174 | 8.50E-11 | 446118 | 9.32E-05 | 41.58007518 |
| Sleep duration | rs2192528 | A | G | 0.48 | 0.802 | 0.136 | 2.70E-09 | 446118 | 7.79E-05 | 34.77514687 |
| Sleep duration | rs2231265 | G | A | 0.772 | 0.897 | 0.162 | 2.70E-08 | 446118 | 6.87E-05 | 30.6586417 |
| Sleep duration | rs269054 | A | T | 0.422 | 0.819 | 0.138 | 2.10E-09 | 446118 | 7.89E-05 | 35.22148671 |
| Sleep duration | rs3095508 | C | A | 0.594 | 0.921 | 0.138 | 3.10E-11 | 446118 | 9.98E-05 | 44.54091563 |
| Sleep duration | rs330088 | C | T | 0.547 | 0.868 | 0.137 | 2.70E-10 | 446118 | 9.00E-05 | 40.14175621 |
| Sleep duration | rs34354917 | C | A | 0.71 | 0.825 | 0.15 | 3.90E-08 | 446118 | 6.78E-05 | 30.24986439 |
| Sleep duration | rs34556183 | A | G | 0.72 | 1.015 | 0.1513938 | 2.30E-11 | 446118 | 0.000100745 | 44.94837108 |
| Sleep duration | rs34731055 | T | C | 0.181 | 1.168 | 0.177 | 3.70E-11 | 446118 | 9.76E-05 | 43.5448908 |
| Sleep duration | rs35531607 | C | T | 0.474 | 0.77 | 0.136 | 1.50E-08 | 446118 | 7.18E-05 | 32.05543588 |
| Sleep duration | rs365663 | A | G | 0.546 | 0.878 | 0.137 | 1.00E-10 | 446118 | 9.21E-05 | 41.07200938 |
| Sleep duration | rs374153 | C | T | 0.158 | 1.057 | 0.186 | 9.10E-09 | 446118 | 7.24E-05 | 32.29402218 |
| Sleep duration | rs4128364 | C | T | 0.339 | 0.876 | 0.143 | 1.40E-09 | 446118 | 8.41E-05 | 37.52616557 |
| Sleep duration | rs4538155 | T | C | 0.647 | 0.779 | 0.142 | 3.60E-08 | 446118 | 6.75E-05 | 30.09513388 |
| Sleep duration | rs4592416 | G | A | 0.464 | 0.881 | 0.136 | 9.30E-11 | 446118 | 9.41E-05 | 41.96353376 |
| Sleep duration | rs460692 | C | T | 0.137 | 1.263 | 0.2 | 3.60E-10 | 446118 | 8.94E-05 | 39.87904622 |
| Sleep duration | rs4767550 | G | A | 0.414 | 0.858 | 0.139 | 6.30E-10 | 446118 | 8.54E-05 | 38.10158375 |
| Sleep duration | rs55658675 | C | T | 0.645 | 0.788 | 0.142 | 2.00E-08 | 446118 | 6.90E-05 | 30.79454554 |
| Sleep duration | rs56372231 | T | C | 0.334 | 1.017 | 0.144 | 2.20E-12 | 446118 | 0.000111794 | 49.87868264 |
| Sleep duration | rs61796569 | T | C | 0.27 | 0.927 | 0.154 | 1.50E-09 | 446118 | 8.12E-05 | 36.23398328 |
| Sleep duration | rs61985058 | T | C | 0.143 | 1.116 | 0.194 | 1.30E-08 | 446118 | 7.42E-05 | 33.09199746 |
| Sleep duration | rs62120041 | T | C | 0.934 | 1.567 | 0.274 | 9.60E-09 | 446118 | 7.33E-05 | 32.70656391 |
| Sleep duration | rs6575005 | T | C | 0.758 | 0.934 | 0.159 | 4.40E-09 | 446118 | 7.73E-05 | 34.5062335 |
| Sleep duration | rs7115226 | A | C | 0.074 | 1.594 | 0.261 | 1.70E-09 | 446118 | 8.36E-05 | 37.29869804 |
| Sleep duration | rs72804080 | G | A | 0.15 | 1.068 | 0.192 | 2.90E-08 | 446118 | 6.94E-05 | 30.94126754 |
| Sleep duration | rs73219758 | G | A | 0.708 | 0.984 | 0.15 | 5.60E-11 | 446118 | 9.65E-05 | 43.03340708 |
| Sleep duration | rs7503199 | C | T | 0.734 | 0.885 | 0.154 | 1.00E-08 | 446118 | 7.40E-05 | 33.02502482 |
| Sleep duration | rs75539574 | C | A | 0.086 | 2.175 | 0.244 | 6.90E-19 | 446118 | 0.000178079 | 79.45787073 |
| Sleep duration | rs7556815 | A | G | 0.219 | 2.443 | 0.164 | 1.30E-49 | 446118 | 0.000497157 | 221.8999942 |
| Sleep duration | rs7616632 | T | G | 0.522 | 0.792 | 0.136 | 4.30E-09 | 446118 | 7.60E-05 | 33.91334277 |
| Sleep duration | rs7644809 | T | C | 0.422 | 0.784 | 0.138 | 1.60E-08 | 446118 | 7.23E-05 | 32.27542766 |
| Sleep duration | rs7806045 | T | C | 0.755 | 0.887 | 0.158 | 1.40E-08 | 446118 | 7.06E-05 | 31.51600196 |
| Sleep duration | rs7915425 | T | C | 0.175 | 1.144 | 0.179 | 2.00E-10 | 446118 | 9.15E-05 | 40.84548337 |
| Sleep duration | rs7951019 | G | T | 0.032 | 2.213 | 0.391 | 1.20E-08 | 446118 | 7.18E-05 | 32.03371933 |
| Sleep duration | rs80193650 | G | A | 0.162 | 1.01 | 0.184 | 4.10E-08 | 446118 | 6.75E-05 | 30.13041785 |
| Sleep duration | rs8038326 | A | G | 0.727 | 0.955 | 0.152 | 2.80E-10 | 446118 | 8.85E-05 | 39.4745893 |
| Sleep duration | rs8050478 | G | A | 0.5 | 0.96 | 0.136 | 1.70E-12 | 446118 | 0.000111678 | 49.82676624 |
| Sleep duration | rs915416 | C | G | 0.29 | 1.156 | 0.15 | 9.90E-15 | 446118 | 0.000133115 | 59.39244485 |
| Sleep duration | rs9345234 | C | A | 0.578 | 0.781 | 0.138 | 1.80E-08 | 446118 | 7.18E-05 | 32.02889443 |
| Sleep duration | rs9382445 | T | C | 0.623 | 0.872 | 0.14 | 4.80E-10 | 446118 | 8.70E-05 | 38.79492812 |
| Sleep duration | rs9903973 | C | T | 0.467 | 0.766 | 0.136 | 2.60E-08 | 446118 | 7.11E-05 | 31.72325743 |
| Sleep duration | rs9940646 | C | G | 0.578 | 1.017 | 0.137 | 1.20E-13 | 446118 | 0.000123509 | 55.10599196 |
| Short sleep duration | rs12567114 | G | A | 0.725 | 0.036 | 0.007 | 4.10E-09 | 411934 | 6.42E-05 | 26.44885118 |
| Short sleep duration | rs2186122 | T | A | 0.562 | 0.024 | 0.006 | 4.80E-09 | 411934 | 3.88E-05 | 15.99992232 |
| Short sleep duration | rs2820313 | G | A | 0.341 | 0.031 | 0.006 | 2.30E-09 | 411934 | 6.48E-05 | 26.69431484 |
| Short sleep duration | rs7524118 | C | T | 0.708 | 0.03 | 0.006 | 4.90E-08 | 411934 | 6.07E-05 | 24.99987862 |
| Short sleep duration | rs1380703 | G | A | 0.384 | 0.035 | 0.006 | 1.60E-11 | 411934 | 8.26E-05 | 34.02761257 |
| Short sleep duration | rs2863957 | C | A | 0.782 | 0.054 | 0.007 | 2.60E-18 | 411934 | 0.000144445 | 59.50991515 |
| Short sleep duration | rs75539574 | A | C | 0.915 | 0.045 | 0.011 | 8.40E-11 | 411934 | 4.06E-05 | 16.73545594 |
| Short sleep duration | rs2014830 | C | T | 0.698 | 0.03 | 0.006 | 2.70E-08 | 411934 | 6.07E-05 | 24.99987862 |
| Short sleep duration | rs13107325 | T | C | 0.075 | 0.075 | 0.011 | 2.50E-13 | 411934 | 0.000112839 | 46.4873776 |
| Short sleep duration | rs17005118 | A | G | 0.265 | 0.03 | 0.007 | 2.50E-09 | 411934 | 4.46E-05 | 18.36725776 |
| Short sleep duration | rs12518468 | C | T | 0.328 | 0.031 | 0.006 | 8.50E-09 | 411934 | 6.48E-05 | 26.69431484 |
| Short sleep duration | rs3776864 | A | C | 0.667 | 0.031 | 0.006 | 1.70E-08 | 411934 | 6.48E-05 | 26.69431484 |
| Short sleep duration | rs4585442 | G | A | 0.311 | 0.031 | 0.006 | 8.10E-10 | 411934 | 6.48E-05 | 26.69431484 |
| Short sleep duration | rs12661667 | T | C | 0.263 | 0.028 | 0.007 | 2.80E-08 | 411934 | 3.88E-05 | 15.99992232 |
| Short sleep duration | rs142180737 | C | T | 0.009 | 0.154 | 0.032 | 4.40E-09 | 411934 | 5.62E-05 | 23.1600438 |
| Short sleep duration | rs9321171 | C | T | 0.54 | 0.031 | 0.006 | 4.20E-08 | 411934 | 6.48E-05 | 26.69431484 |
| Short sleep duration | rs9367621 | T | A | 0.431 | 0.024 | 0.006 | 1.60E-08 | 411934 | 3.88E-05 | 15.99992232 |
| Short sleep duration | rs11763750 | G | A | 0.814 | 0.035 | 0.008 | 5.10E-09 | 411934 | 4.65E-05 | 19.14053207 |
| Short sleep duration | rs1229762 | T | C | 0.665 | 0.037 | 0.003 | 1.10E-12 | 411934 | 0.000369125 | 152.1103726 |
| Short sleep duration | rs60882754 | A | T | 0.939 | 0.055 | 0.012 | 1.80E-08 | 411934 | 5.10E-05 | 21.00684245 |
| Short sleep duration | rs1607227 | G | T | 0.705 | 0.031 | 0.007 | 1.50E-09 | 411934 | 4.76E-05 | 19.61214968 |
| Short sleep duration | rs7939345 | T | G | 0.208 | 0.035 | 0.007 | 4.00E-08 | 411934 | 6.07E-05 | 24.99987862 |
| Short sleep duration | rs17388803 | C | A | 0.106 | 0.053 | 0.01 | 6.50E-10 | 411934 | 6.82E-05 | 28.08986362 |
| Short sleep duration | rs59779556 | T | G | 0.554 | 0.025 | 0.006 | 2.00E-08 | 411934 | 4.21E-05 | 17.36102682 |
| Short sleep duration | rs205024 | C | T | 0.617 | 0.031 | 0.006 | 2.70E-08 | 411934 | 6.48E-05 | 26.69431484 |
| Short sleep duration | rs12963463 | C | T | 0.299 | 0.029 | 0.006 | 1.90E-11 | 411934 | 5.67E-05 | 23.36099769 |
| Short sleep duration | rs5757675 | G | T | 0.26 | 0.034 | 0.007 | 2.70E-09 | 411934 | 5.73E-05 | 23.59172219 |
| Long sleep duration | rs6737318 | G | A | 0.222 | 0.076 | 0.011 | 3.40E-13 | 339926 | 0.000140409 | 47.73525633 |
| Long sleep duration | rs75458655 | T | C | 0.023 | 0.185 | 0.029 | 5.40E-12 | 339926 | 0.000119705 | 40.69536104 |
| Long sleep duration | rs17817288 | A | G | 0.518 | 0.039 | 0.009 | 8.90E-09 | 339926 | 5.52E-05 | 18.7776673 |
| Long sleep duration | rs549961083 | T | C | 0.001 | 0.534 | 0.117 | 9.60E-09 | 339926 | 6.13E-05 | 20.83090965 |
| Long sleep duration | rs3751046 | G | A | 0.147 | 0.07 | 0.013 | 2.00E-08 | 339926 | 8.53E-05 | 28.99391225 |
| Long sleep duration | rs7534398 | A | T | 0.201 | 0.047 | 0.012 | 2.10E-08 | 339926 | 4.51E-05 | 15.34018752 |
| Long sleep duration | rs10899257 | A | G | 0.144 | 0.068 | 0.013 | 4.60E-08 | 339926 | 8.05E-05 | 27.36078576 |
| Long sleep duration | rs17688916 | T | A | 0.796 | 0.071 | 0.012 | 1.10E-11 | 339926 | 0.000102973 | 35.00673848 |
| Chronotype | rs61773390 | T | G | 0.193 | 0.034 | 0.003 | 1.20E-23 | 449734 | 0.000285519 | 128.4438732 |
| Chronotype | rs17448682 | T | C | 0.234 | 0.022 | 0.003 | 2.20E-12 | 449734 | 0.000119563 | 53.77753862 |
| Chronotype | rs10917513 | T | C | 0.648 | -0.018 | 0.003 | 6.70E-10 | 449734 | 8.00E-05 | 35.99983991 |
| Chronotype | rs10916892 | T | C | 0.62 | -0.02 | 0.003 | 6.10E-13 | 449734 | 9.88E-05 | 44.4442468 |
| Chronotype | rs12140153 | T | G | 0.089 | -0.034 | 0.005 | 1.60E-13 | 449734 | 0.000102806 | 46.23979437 |
| Chronotype | rs12040629 | A | G | 0.16 | 0.039 | 0.004 | 6.70E-27 | 449734 | 0.00021133 | 95.06207725 |
| Chronotype | rs11588913 | A | G | 0.404 | -0.015 | 0.003 | 1.50E-08 | 449734 | 5.56E-05 | 24.99988882 |
| Chronotype | rs72720396 | A | G | 0.774 | -0.027 | 0.003 | 8.40E-18 | 449734 | 0.000180074 | 80.99963979 |
| Chronotype | rs11165655 | A | G | 0.528 | -0.016 | 0.003 | 4.10E-09 | 449734 | 6.32E-05 | 28.44431795 |
| Chronotype | rs17575798 | A | G | 0.192 | -0.023 | 0.003 | 4.20E-11 | 449734 | 0.000130677 | 58.77751639 |
| Chronotype | rs9436119 | A | G | 0.384 | 0.023 | 0.003 | 4.00E-18 | 449734 | 0.000130677 | 58.77751639 |
| Chronotype | rs115073088 | A | G | 0.975 | -0.052 | 0.009 | 3.10E-09 | 449734 | 7.42E-05 | 33.38256759 |
| Chronotype | rs975025 | T | C | 0.076 | -0.032 | 0.005 | 1.30E-10 | 449734 | 9.11E-05 | 40.95981785 |
| Chronotype | rs1144566 | T | C | 0.029 | 0.113 | 0.008 | 5.80E-47 | 449734 | 0.000443434 | 199.5147377 |
| Chronotype | rs13011556 | C | G | 0.762 | -0.023 | 0.003 | 1.10E-12 | 449734 | 0.000130677 | 58.77751639 |
| Chronotype | rs72796401 | A | T | 0.19 | 0.022 | 0.003 | 5.90E-11 | 449734 | 0.000119563 | 53.77753862 |
| Chronotype | rs848552 | C | G | 0.476 | -0.015 | 0.003 | 7.00E-09 | 449734 | 5.56E-05 | 24.99988882 |
| Chronotype | rs75120545 | T | C | 0.032 | 0.061 | 0.008 | 1.10E-13 | 449734 | 0.000129261 | 58.14036644 |
| Chronotype | rs12470914 | A | T | 0.101 | 0.026 | 0.004 | 2.20E-09 | 449734 | 9.39E-05 | 42.24981211 |
| Chronotype | rs4672458 | T | C | 0.476 | -0.016 | 0.003 | 1.10E-09 | 449734 | 6.32E-05 | 28.44431795 |
| Chronotype | rs10175975 | T | C | 0.185 | 0.023 | 0.004 | 1.80E-10 | 449734 | 7.35E-05 | 33.06235297 |
| Chronotype | rs359248 | T | G | 0.456 | -0.016 | 0.003 | 1.50E-09 | 449734 | 6.32E-05 | 28.44431795 |
| Chronotype | rs812925 | C | G | 0.646 | -0.021 | 0.003 | 6.90E-13 | 449734 | 0.000108941 | 48.99978209 |
| Chronotype | rs113851554 | T | G | 0.057 | -0.036 | 0.006 | 1.00E-09 | 449734 | 8.00E-05 | 35.99983991 |
| Chronotype | rs2706762 | T | C | 0.15 | -0.022 | 0.004 | 4.00E-09 | 449734 | 6.73E-05 | 30.24986548 |
| Chronotype | rs6727752 | A | G | 0.357 | 0.016 | 0.003 | 1.40E-08 | 449734 | 6.32E-05 | 28.44431795 |
| Chronotype | rs10520176 | T | C | 0.493 | 0.023 | 0.003 | 1.40E-17 | 449734 | 0.000130677 | 58.77751639 |
| Chronotype | rs28380327 | A | T | 0.632 | 0.021 | 0.003 | 2.90E-13 | 449734 | 0.000108941 | 48.99978209 |
| Chronotype | rs2166559 | T | C | 0.861 | -0.022 | 0.004 | 9.10E-09 | 449734 | 6.73E-05 | 30.24986548 |
| Chronotype | rs11677484 | T | G | 0.257 | 0.019 | 0.003 | 1.70E-09 | 449734 | 8.92E-05 | 40.11093273 |
| Chronotype | rs1064213 | A | G | 0.483 | 0.019 | 0.003 | 1.30E-12 | 449734 | 8.92E-05 | 40.11093273 |
| Chronotype | rs184033703 | A | G | 0.059 | 0.038 | 0.006 | 8.10E-11 | 449734 | 8.92E-05 | 40.11093273 |
| Chronotype | rs80271258 | T | C | 0.084 | -0.055 | 0.005 | 2.60E-30 | 449734 | 0.000268976 | 120.9994619 |
| Chronotype | rs62182135 | A | C | 0.329 | -0.018 | 0.003 | 3.70E-10 | 449734 | 8.00E-05 | 35.99983991 |
| Chronotype | rs149611468 | T | C | 0.989 | 0.078 | 0.013 | 8.50E-10 | 449734 | 8.00E-05 | 35.99983991 |
| Chronotype | rs6794796 | A | G | 0.29 | 0.017 | 0.003 | 5.30E-09 | 449734 | 7.14E-05 | 32.11096831 |
| Chronotype | rs9817910 | A | G | 0.558 | -0.017 | 0.003 | 3.10E-10 | 449734 | 7.14E-05 | 32.11096831 |
| Chronotype | rs73050286 | T | C | 0.782 | 0.018 | 0.003 | 2.60E-08 | 449734 | 8.00E-05 | 35.99983991 |
| Chronotype | rs2362775 | T | C | 0.534 | -0.018 | 0.003 | 2.80E-11 | 449734 | 8.00E-05 | 35.99983991 |
| Chronotype | rs114848860 | A | T | 0.974 | -0.056 | 0.009 | 3.60E-10 | 449734 | 8.61E-05 | 38.71587721 |
| Chronotype | rs78580841 | T | C | 0.069 | 0.031 | 0.005 | 3.70E-09 | 449734 | 8.55E-05 | 38.43982905 |
| Chronotype | rs12636669 | T | C | 0.08 | 0.034 | 0.005 | 5.80E-12 | 449734 | 0.000102806 | 46.23979437 |
| Chronotype | rs7429614 | T | G | 0.416 | 0.016 | 0.003 | 9.20E-10 | 449734 | 6.32E-05 | 28.44431795 |
| Chronotype | rs1800828 | C | G | 0.751 | 0.018 | 0.003 | 1.70E-08 | 449734 | 8.00E-05 | 35.99983991 |
| Chronotype | rs72966564 | T | C | 0.251 | -0.017 | 0.003 | 2.50E-08 | 449734 | 7.14E-05 | 32.11096831 |
| Chronotype | rs13065394 | T | G | 0.286 | -0.018 | 0.003 | 3.00E-09 | 449734 | 8.00E-05 | 35.99983991 |
| Chronotype | rs4550782 | T | G | 0.666 | 0.016 | 0.003 | 2.20E-08 | 449734 | 6.32E-05 | 28.44431795 |
| Chronotype | rs1599374 | A | G | 0.516 | 0.015 | 0.003 | 1.50E-08 | 449734 | 5.56E-05 | 24.99988882 |
| Chronotype | rs3850174 | A | T | 0.258 | -0.019 | 0.003 | 6.80E-10 | 449734 | 8.92E-05 | 40.11093273 |
| Chronotype | rs1468945 | A | G | 0.785 | -0.023 | 0.003 | 4.20E-12 | 449734 | 0.000130677 | 58.77751639 |
| Chronotype | rs4690085 | A | G | 0.535 | -0.015 | 0.003 | 3.90E-08 | 449734 | 5.56E-05 | 24.99988882 |
| Chronotype | rs6846730 | T | C | 0.235 | -0.022 | 0.003 | 5.60E-12 | 449734 | 0.000119563 | 53.77753862 |
| Chronotype | rs4241964 | T | G | 0.522 | -0.021 | 0.003 | 1.10E-14 | 449734 | 0.000108941 | 48.99978209 |
| Chronotype | rs10058356 | T | C | 0.696 | -0.017 | 0.003 | 6.80E-09 | 449734 | 7.14E-05 | 32.11096831 |
| Chronotype | rs7701529 | A | T | 0.239 | -0.019 | 0.003 | 3.60E-09 | 449734 | 8.92E-05 | 40.11093273 |
| Chronotype | rs4269995 | T | C | 0.251 | -0.021 | 0.003 | 5.90E-12 | 449734 | 0.000108941 | 48.99978209 |
| Chronotype | rs77960 | A | G | 0.33 | 0.019 | 0.003 | 4.20E-11 | 449734 | 8.92E-05 | 40.11093273 |
| Chronotype | rs67988891 | C | G | 0.682 | -0.023 | 0.003 | 3.70E-15 | 449734 | 0.000130677 | 58.77751639 |
| Chronotype | rs7735794 | A | G | 0.224 | 0.02 | 0.003 | 4.70E-09 | 449734 | 9.88E-05 | 44.4442468 |
| Chronotype | rs9394154 | C | G | 0.436 | -0.016 | 0.003 | 1.30E-08 | 449734 | 6.32E-05 | 28.44431795 |
| Chronotype | rs9381812 | A | G | 0.705 | -0.023 | 0.003 | 4.60E-15 | 449734 | 0.000130677 | 58.77751639 |
| Chronotype | rs486416 | A | G | 0.653 | -0.015 | 0.003 | 2.30E-08 | 449734 | 5.56E-05 | 24.99988882 |
| Chronotype | rs12206814 | C | G | 0.487 | 0.015 | 0.003 | 2.80E-08 | 449734 | 5.56E-05 | 24.99988882 |
| Chronotype | rs3857599 | A | C | 0.166 | 0.022 | 0.004 | 1.40E-09 | 449734 | 6.73E-05 | 30.24986548 |
| Chronotype | rs2653349 | A | G | 0.207 | 0.039 | 0.003 | 5.20E-32 | 449734 | 0.000375637 | 168.9992484 |
| Chronotype | rs1931814 | A | G | 0.479 | 0.015 | 0.003 | 1.60E-08 | 449734 | 5.56E-05 | 24.99988882 |
| Chronotype | rs2881955 | T | C | 0.279 | 0.016 | 0.003 | 4.30E-08 | 449734 | 6.32E-05 | 28.44431795 |
| Chronotype | rs60616179 | A | G | 0.944 | 0.038 | 0.006 | 1.10E-10 | 449734 | 8.92E-05 | 40.11093273 |
| Chronotype | rs9479402 | T | C | 0.988 | -0.107 | 0.013 | 3.20E-16 | 449734 | 0.000150612 | 67.74526086 |
| Chronotype | rs9347926 | A | T | 0.441 | 0.016 | 0.003 | 7.30E-09 | 449734 | 6.32E-05 | 28.44431795 |
| Chronotype | rs9348050 | T | C | 0.486 | 0.017 | 0.003 | 7.50E-10 | 449734 | 7.14E-05 | 32.11096831 |
| Chronotype | rs10237162 | T | C | 0.723 | 0.018 | 0.003 | 3.50E-09 | 449734 | 8.00E-05 | 35.99983991 |
| Chronotype | rs10951325 | T | C | 0.632 | 0.021 | 0.003 | 7.90E-14 | 449734 | 0.000108941 | 48.99978209 |
| Chronotype | rs6967481 | T | C | 0.501 | 0.021 | 0.003 | 6.90E-15 | 449734 | 0.000108941 | 48.99978209 |
| Chronotype | rs2944831 | A | G | 0.295 | 0.017 | 0.003 | 1.10E-08 | 449734 | 7.14E-05 | 32.11096831 |
| Chronotype | rs10254050 | C | G | 0.191 | -0.025 | 0.003 | 1.20E-12 | 449734 | 0.000154388 | 69.44413562 |
| Chronotype | rs4729854 | A | T | 0.47 | -0.029 | 0.003 | 3.30E-25 | 449734 | 0.000207734 | 93.44402889 |
| Chronotype | rs17302081 | T | C | 0.441 | 0.016 | 0.003 | 6.90E-09 | 449734 | 6.32E-05 | 28.44431795 |
| Chronotype | rs35524253 | A | G | 0.354 | 0.016 | 0.003 | 5.80E-09 | 449734 | 6.32E-05 | 28.44431795 |
| Chronotype | rs2979139 | A | G | 0.505 | -0.017 | 0.003 | 7.40E-10 | 449734 | 7.14E-05 | 32.11096831 |
| Chronotype | rs71523448 | C | G | 0.079 | -0.028 | 0.005 | 2.00E-08 | 449734 | 6.97E-05 | 31.35986054 |
| Chronotype | rs6993892 | T | C | 0.616 | -0.021 | 0.003 | 8.40E-14 | 449734 | 0.000108941 | 48.99978209 |
| Chronotype | rs7845620 | A | C | 0.834 | -0.022 | 0.004 | 5.20E-10 | 449734 | 6.73E-05 | 30.24986548 |
| Chronotype | rs16939162 | A | G | 0.83 | 0.025 | 0.004 | 2.20E-12 | 449734 | 8.68E-05 | 39.06232629 |
| Chronotype | rs3100052 | A | G | 0.389 | 0.017 | 0.003 | 6.90E-10 | 449734 | 7.14E-05 | 32.11096831 |
| Chronotype | rs2737245 | T | G | 0.275 | 0.022 | 0.003 | 4.50E-13 | 449734 | 0.000119563 | 53.77753862 |
| Chronotype | rs6477309 | T | C | 0.666 | 0.017 | 0.003 | 8.00E-10 | 449734 | 7.14E-05 | 32.11096831 |
| Chronotype | rs308521 | T | C | 0.604 | 0.02 | 0.003 | 3.70E-13 | 449734 | 9.88E-05 | 44.4442468 |
| Chronotype | rs62553781 | T | C | 0.033 | -0.05 | 0.007 | 1.20E-11 | 449734 | 0.000113433 | 51.02018127 |
| Chronotype | rs295268 | T | C | 0.74 | -0.017 | 0.003 | 4.10E-08 | 449734 | 7.14E-05 | 32.11096831 |
| Chronotype | rs10818834 | T | C | 0.73 | 0.019 | 0.003 | 1.10E-09 | 449734 | 8.92E-05 | 40.11093273 |
| Chronotype | rs10988239 | T | C | 0.512 | -0.019 | 0.003 | 1.60E-11 | 449734 | 8.92E-05 | 40.11093273 |
| Chronotype | rs12380242 | T | C | 0.506 | -0.016 | 0.003 | 1.60E-09 | 449734 | 6.32E-05 | 28.44431795 |
| Chronotype | rs28458909 | T | C | 0.123 | -0.043 | 0.004 | 2.60E-26 | 449734 | 0.000256891 | 115.5619861 |
| Chronotype | rs9416744 | A | C | 0.26 | 0.019 | 0.003 | 1.30E-09 | 449734 | 8.92E-05 | 40.11093273 |
| Chronotype | rs3808964 | T | G | 0.633 | 0.016 | 0.003 | 2.70E-08 | 449734 | 6.32E-05 | 28.44431795 |
| Chronotype | rs10832648 | A | C | 0.199 | -0.02 | 0.003 | 3.20E-09 | 449734 | 9.88E-05 | 44.4442468 |
| Chronotype | rs10742179 | A | G | 0.263 | 0.018 | 0.003 | 1.50E-09 | 449734 | 8.00E-05 | 35.99983991 |
| Chronotype | rs621421 | T | C | 0.626 | -0.018 | 0.003 | 7.50E-11 | 449734 | 8.00E-05 | 35.99983991 |
| Chronotype | rs11032362 | A | G | 0.094 | 0.04 | 0.005 | 4.80E-17 | 449734 | 0.000142286 | 63.99971539 |
| Chronotype | rs7111582 | A | G | 0.896 | -0.028 | 0.004 | 5.20E-10 | 449734 | 0.000108941 | 48.99978209 |
| Chronotype | rs12808544 | A | C | 0.241 | -0.021 | 0.003 | 3.00E-11 | 449734 | 0.000108941 | 48.99978209 |
| Chronotype | rs4936290 | A | C | 0.658 | -0.018 | 0.003 | 4.60E-10 | 449734 | 8.00E-05 | 35.99983991 |
| Chronotype | rs74357745 | A | G | 0.88 | 0.027 | 0.004 | 8.70E-11 | 449734 | 0.0001013 | 45.56229738 |
| Chronotype | rs7943634 | T | C | 0.308 | -0.016 | 0.003 | 1.40E-08 | 449734 | 6.32E-05 | 28.44431795 |
| Chronotype | rs12298405 | T | C | 0.33 | -0.016 | 0.003 | 2.70E-08 | 449734 | 6.32E-05 | 28.44431795 |
| Chronotype | rs11611435 | T | C | 0.556 | 0.016 | 0.003 | 8.60E-09 | 449734 | 6.32E-05 | 28.44431795 |
| Chronotype | rs13377754 | T | C | 0.61 | 0.03 | 0.003 | 6.90E-27 | 449734 | 0.000222304 | 99.99955529 |
| Chronotype | rs1843888 | A | G | 0.543 | 0.029 | 0.003 | 3.20E-26 | 449734 | 0.000207734 | 93.44402889 |
| Chronotype | rs247929 | C | G | 0.508 | 0.018 | 0.003 | 6.20E-11 | 449734 | 8.00E-05 | 35.99983991 |
| Chronotype | rs7299922 | A | G | 0.639 | 0.016 | 0.003 | 2.50E-09 | 449734 | 6.32E-05 | 28.44431795 |
| Chronotype | rs7959983 | T | C | 0.596 | -0.02 | 0.003 | 9.50E-13 | 449734 | 9.88E-05 | 44.4442468 |
| Chronotype | rs7304278 | A | G | 0.283 | -0.02 | 0.003 | 2.20E-11 | 449734 | 9.88E-05 | 44.4442468 |
| Chronotype | rs7298532 | T | C | 0.721 | 0.016 | 0.003 | 2.70E-08 | 449734 | 6.32E-05 | 28.44431795 |
| Chronotype | rs80097534 | T | G | 0.097 | -0.028 | 0.005 | 9.30E-10 | 449734 | 6.97E-05 | 31.35986054 |
| Chronotype | rs9597241 | A | C | 0.811 | 0.021 | 0.003 | 7.50E-10 | 449734 | 0.000108941 | 48.99978209 |
| Chronotype | rs12871550 | A | G | 0.323 | 0.016 | 0.003 | 2.60E-08 | 449734 | 6.32E-05 | 28.44431795 |
| Chronotype | rs9573980 | A | G | 0.966 | 0.073 | 0.007 | 5.70E-22 | 449734 | 0.000241762 | 108.7546184 |
| Chronotype | rs1886205 | A | C | 0.76 | 0.019 | 0.003 | 4.90E-10 | 449734 | 8.92E-05 | 40.11093273 |
| Chronotype | rs962961 | T | C | 0.331 | -0.016 | 0.003 | 2.00E-08 | 449734 | 6.32E-05 | 28.44431795 |
| Chronotype | rs59986227 | C | G | 0.749 | -0.018 | 0.003 | 8.30E-09 | 449734 | 8.00E-05 | 35.99983991 |
| Chronotype | rs11641239 | T | C | 0.285 | 0.017 | 0.003 | 1.10E-08 | 449734 | 7.14E-05 | 32.11096831 |
| Chronotype | rs7203707 | A | C | 0.519 | -0.016 | 0.003 | 7.60E-10 | 449734 | 6.32E-05 | 28.44431795 |
| Chronotype | rs12927162 | A | G | 0.728 | 0.029 | 0.003 | 6.80E-22 | 449734 | 0.000207734 | 93.44402889 |
| Chronotype | rs1421085 | T | C | 0.594 | -0.028 | 0.003 | 1.50E-23 | 449734 | 0.000193657 | 87.11072372 |
| Chronotype | rs2550298 | T | C | 0.381 | -0.024 | 0.003 | 3.60E-18 | 449734 | 0.000142286 | 63.99971539 |
| Chronotype | rs8044054 | T | C | 0.388 | 0.019 | 0.003 | 1.50E-12 | 449734 | 8.92E-05 | 40.11093273 |
| Chronotype | rs17604349 | A | G | 0.185 | -0.026 | 0.004 | 1.70E-13 | 449734 | 9.39E-05 | 42.24981211 |
| Chronotype | rs1061032 | T | G | 0.094 | 0.039 | 0.005 | 2.00E-16 | 449734 | 0.000135262 | 60.83972944 |
| Chronotype | rs11545787 | A | G | 0.248 | -0.024 | 0.003 | 4.90E-14 | 449734 | 0.000142286 | 63.99971539 |
| Chronotype | rs2011528 | T | C | 0.825 | -0.021 | 0.004 | 5.30E-09 | 449734 | 6.13E-05 | 27.56237743 |
| Chronotype | rs55846845 | A | G | 0.518 | -0.016 | 0.003 | 2.40E-09 | 449734 | 6.32E-05 | 28.44431795 |
| Chronotype | rs72829706 | A | G | 0.96 | 0.041 | 0.007 | 5.10E-09 | 449734 | 7.63E-05 | 34.30596989 |
| Chronotype | rs72841368 | A | T | 0.81 | -0.02 | 0.003 | 8.70E-09 | 449734 | 9.88E-05 | 44.4442468 |
| Chronotype | rs2916148 | A | G | 0.452 | 0.016 | 0.003 | 3.50E-09 | 449734 | 6.32E-05 | 28.44431795 |
| Chronotype | rs2580160 | A | G | 0.555 | 0.015 | 0.003 | 1.70E-08 | 449734 | 5.56E-05 | 24.99988882 |
| Chronotype | rs62082402 | T | G | 0.194 | 0.026 | 0.003 | 1.60E-14 | 449734 | 0.000166984 | 75.11077709 |
| Chronotype | rs1013987 | T | C | 0.403 | -0.018 | 0.003 | 1.50E-11 | 449734 | 8.00E-05 | 35.99983991 |
| Chronotype | rs4419127 | A | G | 0.662 | 0.022 | 0.003 | 1.30E-14 | 449734 | 0.000119563 | 53.77753862 |
| Chronotype | rs12969848 | T | C | 0.531 | 0.022 | 0.003 | 1.30E-15 | 449734 | 0.000119563 | 53.77753862 |
| Chronotype | rs9964420 | A | C | 0.298 | -0.028 | 0.003 | 8.60E-22 | 449734 | 0.000193657 | 87.11072372 |
| Chronotype | rs11152350 | A | C | 0.467 | -0.016 | 0.003 | 1.30E-09 | 449734 | 6.32E-05 | 28.44431795 |
| Chronotype | rs10402849 | T | C | 0.2 | 0.019 | 0.003 | 8.90E-09 | 449734 | 8.92E-05 | 40.11093273 |
| Chronotype | rs36055559 | A | G | 0.166 | -0.021 | 0.004 | 1.50E-08 | 449734 | 6.13E-05 | 27.56237743 |
| Chronotype | rs7248205 | T | C | 0.6 | 0.015 | 0.003 | 3.80E-08 | 449734 | 5.56E-05 | 24.99988882 |
| Chronotype | rs9636202 | A | G | 0.266 | -0.018 | 0.003 | 7.50E-10 | 449734 | 8.00E-05 | 35.99983991 |
| Chronotype | rs11670534 | T | C | 0.161 | -0.021 | 0.004 | 8.50E-09 | 449734 | 6.13E-05 | 27.56237743 |
| Chronotype | rs6131805 | T | G | 0.402 | 0.016 | 0.003 | 1.50E-08 | 449734 | 6.32E-05 | 28.44431795 |
| Chronotype | rs6131942 | A | G | 0.418 | -0.018 | 0.003 | 9.40E-11 | 449734 | 8.00E-05 | 35.99983991 |
| Chronotype | rs2072727 | T | C | 0.433 | 0.016 | 0.003 | 8.50E-10 | 449734 | 6.32E-05 | 28.44431795 |
| Chronotype | rs139911 | T | C | 0.572 | -0.023 | 0.003 | 2.30E-17 | 449734 | 0.000130677 | 58.77751639 |
| Chronotype | rs9611597 | A | T | 0.837 | 0.021 | 0.004 | 1.80E-08 | 449734 | 6.13E-05 | 27.56237743 |
| Frequent insomnia | rs11184946 | T | C | 0.417 | 0.03 | 0.007 | 2.90E-10 | 453379 | 4.05E-05 | 18.36726591 |
| Frequent insomnia | rs6664467 | G | A | 0.863 | 0.049 | 0.007 | 4.50E-08 | 453379 | 0.000108066 | 48.99978385 |
| Frequent insomnia | rs4751 | T | G | 0.425 | 0.03 | 0.007 | 1.60E-08 | 453379 | 4.05E-05 | 18.36726591 |
| Frequent insomnia | rs2644128 | G | C | 0.55 | 0.039 | 0.007 | 1.00E-12 | 453379 | 6.85E-05 | 31.0406794 |
| Frequent insomnia | rs12405761 | A | C | 0.571 | 0.039 | 0.005 | 2.60E-11 | 453379 | 0.000134174 | 60.83973162 |
| Frequent insomnia | rs11804386 | A | G | 0.332 | 0.039 | 0.007 | 2.60E-08 | 453379 | 6.85E-05 | 31.0406794 |
| Frequent insomnia | rs2296580 | G | T | 0.702 | 0.049 | 0.01 | 8.70E-12 | 453379 | 5.30E-05 | 24.00989408 |
| Frequent insomnia | rs11191595 | A | C | 0.937 | 0.095 | 0.019 | 1.50E-09 | 453379 | 5.51E-05 | 24.99988972 |
| Frequent insomnia | rs10838708 | G | A | 0.541 | 0.03 | 0.005 | 2.50E-09 | 453379 | 7.94E-05 | 35.99984119 |
| Frequent insomnia | rs68094047 | T | C | 0.25 | 0.039 | 0.007 | 3.30E-09 | 453379 | 6.85E-05 | 31.0406794 |
| Frequent insomnia | rs324017 | A | C | 0.295 | 0.049 | 0.007 | 1.10E-10 | 453379 | 0.000108066 | 48.99978385 |
| Frequent insomnia | rs2956278 | G | A | 0.215 | 0.049 | 0.01 | 1.30E-08 | 453379 | 5.30E-05 | 24.00989408 |
| Frequent insomnia | rs1923770 | T | A | 0.383 | 0.049 | 0.007 | 2.30E-12 | 453379 | 0.000108066 | 48.99978385 |
| Frequent insomnia | rs1031654 | C | A | 0.202 | 0.049 | 0.01 | 2.00E-09 | 453379 | 5.30E-05 | 24.00989408 |
| Frequent insomnia | rs4886140 | G | A | 0.668 | 0.039 | 0.007 | 3.10E-10 | 453379 | 6.85E-05 | 31.0406794 |
| Frequent insomnia | rs11635495 | C | T | 0.515 | 0.039 | 0.007 | 6.80E-09 | 453379 | 6.85E-05 | 31.0406794 |
| Frequent insomnia | rs4886860 | G | C | 0.234 | 0.049 | 0.007 | 6.10E-12 | 453379 | 0.000108066 | 48.99978385 |
| Frequent insomnia | rs1544637 | T | C | 0.488 | 0.03 | 0.005 | 3.00E-08 | 453379 | 7.94E-05 | 35.99984119 |
| Frequent insomnia | rs3104778 | A | G | 0.589 | 0.03 | 0.007 | 4.20E-08 | 453379 | 4.05E-05 | 18.36726591 |
| Frequent insomnia | rs2062113 | T | C | 0.43 | 0.039 | 0.007 | 1.90E-10 | 453379 | 6.85E-05 | 31.0406794 |
| Frequent insomnia | rs17139246 | C | T | 0.389 | 0.03 | 0.007 | 4.10E-08 | 453379 | 4.05E-05 | 18.36726591 |
| Frequent insomnia | rs17669584 | G | A | 0.195 | 0.039 | 0.007 | 3.60E-08 | 453379 | 6.85E-05 | 31.0406794 |
| Frequent insomnia | rs11651809 | G | C | 0.296 | 0.049 | 0.007 | 2.10E-15 | 453379 | 0.000108066 | 48.99978385 |
| Frequent insomnia | rs1942262 | A | G | 0.292 | 0.039 | 0.007 | 1.10E-13 | 453379 | 6.85E-05 | 31.0406794 |
| Frequent insomnia | rs11673344 | G | A | 0.38 | 0.039 | 0.007 | 9.00E-10 | 453379 | 6.85E-05 | 31.0406794 |
| Frequent insomnia | rs62158170 | A | G | 0.784 | 0.049 | 0.01 | 5.70E-13 | 453379 | 5.30E-05 | 24.00989408 |
| Frequent insomnia | rs4577309 | A | G | 0.468 | 0.03 | 0.007 | 3.70E-09 | 453379 | 4.05E-05 | 18.36726591 |
| Frequent insomnia | rs35881094 | G | T | 0.426 | 0.049 | 0.007 | 3.00E-15 | 453379 | 0.000108066 | 48.99978385 |
| Frequent insomnia | rs113851554 | T | G | 0.058 | 0.182 | 0.017 | 1.30E-41 | 453379 | 0.00025274 | 114.6154113 |
| Frequent insomnia | rs72826719 | A | G | 0.049 | 0.095 | 0.016 | 2.20E-12 | 453379 | 7.78E-05 | 35.25375073 |
| Frequent insomnia | rs9845387 | C | A | 0.959 | 0.095 | 0.019 | 2.10E-08 | 453379 | 5.51E-05 | 24.99988972 |
| Frequent insomnia | rs4683301 | T | A | 0.6 | 0.039 | 0.007 | 4.60E-08 | 453379 | 6.85E-05 | 31.0406794 |
| Frequent insomnia | rs10865954 | T | C | 0.334 | 0.039 | 0.007 | 1.70E-09 | 453379 | 6.85E-05 | 31.0406794 |
| Frequent insomnia | rs4688760 | T | C | 0.69 | 0.049 | 0.007 | 1.00E-12 | 453379 | 0.000108066 | 48.99978385 |
| Frequent insomnia | rs11097861 | G | A | 0.715 | 0.039 | 0.005 | 1.70E-09 | 453379 | 0.000134174 | 60.83973162 |
| Frequent insomnia | rs1841625 | G | A | 0.432 | 0.03 | 0.007 | 3.60E-08 | 453379 | 4.05E-05 | 18.36726591 |
| Frequent insomnia | rs28061 | A | G | 0.692 | 0.039 | 0.007 | 2.10E-08 | 453379 | 6.85E-05 | 31.0406794 |
| Frequent insomnia | rs1592757 | C | G | 0.357 | 0.039 | 0.007 | 4.60E-10 | 453379 | 6.85E-05 | 31.0406794 |
| Frequent insomnia | rs7711696 | T | G | 0.305 | 0.049 | 0.007 | 9.90E-12 | 453379 | 0.000108066 | 48.99978385 |
| Frequent insomnia | rs1430205 | T | C | 0.458 | 0.03 | 0.007 | 3.60E-08 | 453379 | 4.05E-05 | 18.36726591 |
| Frequent insomnia | rs6932158 | C | T | 0.491 | 0.03 | 0.007 | 2.80E-08 | 453379 | 4.05E-05 | 18.36726591 |
| Frequent insomnia | rs314280 | G | A | 0.548 | 0.039 | 0.007 | 3.50E-10 | 453379 | 6.85E-05 | 31.0406794 |
| Frequent insomnia | rs10947690 | G | A | 0.261 | 0.039 | 0.01 | 3.50E-08 | 453379 | 3.35E-05 | 15.2099329 |
| Frequent insomnia | rs3824081 | T | C | 0.475 | 0.039 | 0.007 | 1.10E-08 | 453379 | 6.85E-05 | 31.0406794 |
| Frequent insomnia | rs10280045 | G | C | 0.574 | 0.039 | 0.005 | 1.00E-10 | 453379 | 0.000134174 | 60.83973162 |
| Frequent insomnia | rs6593005 | G | A | 0.741 | 0.03 | 0.007 | 8.60E-09 | 453379 | 4.05E-05 | 18.36726591 |
| Frequent insomnia | rs17151854 | T | G | 0.154 | 0.058 | 0.01 | 2.40E-08 | 453379 | 7.42E-05 | 33.6398516 |
| Frequent insomnia | rs10156602 | A | G | 0.638 | 0.039 | 0.005 | 3.40E-12 | 453379 | 0.000134174 | 60.83973162 |
| Daytime napping | rs11615756 | T | C | 0.405 | 0.018 | 0.001 | 1.40E-49 | 452633 | 0.0007153 | 323.9985684 |
| Daytime napping | rs385199 | A | C | 0.772 | 0.021 | 0.001 | 7.50E-47 | 452633 | 0.000973351 | 440.9980514 |
| Daytime napping | rs12140153 | G | T | 0.9 | 0.025 | 0.002 | 2.40E-31 | 452633 | 0.000345083 | 156.2493096 |
| Daytime napping | rs2653349 | A | G | 0.215 | 0.017 | 0.001 | 3.40E-29 | 452633 | 0.000638079 | 288.998723 |
| Daytime napping | rs9965170 | G | A | 0.577 | 0.014 | 0.001 | 7.80E-29 | 452633 | 0.000432834 | 195.999134 |
| Daytime napping | rs2250377 | A | G | 0.339 | 0.013 | 0.001 | 1.40E-24 | 452633 | 0.000373232 | 168.9992533 |
| Daytime napping | rs2431108 | C | T | 0.329 | 0.013 | 0.001 | 7.70E-24 | 452633 | 0.000373232 | 168.9992533 |
| Daytime napping | rs13284688 | C | T | 0.207 | 0.015 | 0.001 | 1.70E-23 | 452633 | 0.000496844 | 224.9990058 |
| Daytime napping | rs614987 | C | A | 0.614 | 0.011 | 0.001 | 7.50E-19 | 452633 | 0.000267253 | 120.9994654 |
| Daytime napping | rs10875622 | A | G | 0.575 | 0.01 | 0.001 | 1.30E-17 | 452633 | 0.000220881 | 99.99955814 |
| Daytime napping | rs796858289 | G | G | 0.584 | 0.01 | 0.001 | 5.00E-17 | 452633 | 0.000220881 | 99.99955814 |
| Daytime napping | rs6919087 | T | G | 0.688 | 0.011 | 0.001 | 1.00E-16 | 452633 | 0.000267253 | 120.9994654 |
| Daytime napping | rs174541 | C | T | 0.36 | 0.01 | 0.001 | 4.40E-15 | 452633 | 0.000220881 | 99.99955814 |
| Daytime napping | rs2195272 | T | G | 0.329 | 0.01 | 0.001 | 6.70E-15 | 452633 | 0.000220881 | 99.99955814 |
| Daytime napping | rs2861805 | A | G | 0.54 | 0.009 | 0.001 | 2.00E-14 | 452633 | 0.000178921 | 80.99964209 |
| Daytime napping | rs13033444 | G | A | 0.283 | 0.01 | 0.001 | 3.60E-13 | 452633 | 0.000220881 | 99.99955814 |
| Daytime napping | rs11258652 | C | A | 0.763 | 0.01 | 0.001 | 3.70E-13 | 452633 | 0.000220881 | 99.99955814 |
| Daytime napping | rs1592544 | C | T | 0.504 | 0.009 | 0.001 | 8.50E-13 | 452633 | 0.000178921 | 80.99964209 |
| Daytime napping | rs12451365 | C | T | 0.205 | 0.011 | 0.002 | 1.50E-12 | 452633 | 6.68E-05 | 30.24986634 |
| Daytime napping | rs542011541 | C | C | 0.236 | 0.01 | 0.001 | 3.10E-12 | 452633 | 0.000220881 | 99.99955814 |
| Daytime napping | rs749865489 | C | C | 0.447 | 0.009 | 0.001 | 3.80E-12 | 452633 | 0.000178921 | 80.99964209 |
| Daytime napping | rs10149986 | G | T | 0.185 | 0.011 | 0.002 | 4.40E-12 | 452633 | 6.68E-05 | 30.24986634 |
| Daytime napping | rs2786547 | C | T | 0.823 | 0.011 | 0.002 | 1.00E-11 | 452633 | 6.68E-05 | 30.24986634 |
| Daytime napping | rs11125776 | T | G | 0.854 | 0.012 | 0.002 | 1.50E-11 | 452633 | 7.95E-05 | 35.99984093 |
| Daytime napping | rs350785 | T | C | 0.115 | 0.013 | 0.002 | 1.50E-11 | 452633 | 9.33E-05 | 42.24981331 |
| Daytime napping | rs2769916 | A | G | 0.689 | 0.009 | 0.001 | 1.70E-11 | 452633 | 0.000178921 | 80.99964209 |
| Daytime napping | rs1601440 | C | T | 0.279 | 0.009 | 0.001 | 1.90E-11 | 452633 | 0.000178921 | 80.99964209 |
| Daytime napping | rs17158413 | A | G | 0.237 | 0.009 | 0.001 | 4.40E-11 | 452633 | 0.000178921 | 80.99964209 |
| Daytime napping | rs35011311 | G | T | 0.734 | 0.009 | 0.001 | 4.40E-11 | 452633 | 0.000178921 | 80.99964209 |
| Daytime napping | rs3935190 | A | G | 0.536 | 0.008 | 0.001 | 5.40E-11 | 452633 | 0.000141375 | 63.99971721 |
| Daytime napping | rs962247 | G | A | 0.523 | 0.008 | 0.001 | 5.70E-11 | 452633 | 0.000141375 | 63.99971721 |
| Daytime napping | rs60222088 | C | A | 0.853 | 0.011 | 0.002 | 6.40E-11 | 452633 | 6.68E-05 | 30.24986634 |
| Daytime napping | rs13150944 | G | A | 0.689 | 0.009 | 0.001 | 6.80E-11 | 452633 | 0.000178921 | 80.99964209 |
| Daytime napping | rs141957346 | A | A | 0.59 | 0.008 | 0.001 | 7.10E-11 | 452633 | 0.000141375 | 63.99971721 |
| Daytime napping | rs35039375 | G | A | 0.092 | 0.014 | 0.002 | 8.70E-11 | 452633 | 0.000108244 | 48.99978349 |
| Daytime napping | rs4236060 | T | C | 0.272 | 0.009 | 0.001 | 8.80E-11 | 452633 | 0.000178921 | 80.99964209 |
| Daytime napping | rs80163246 | C | T | 0.117 | 0.012 | 0.002 | 1.40E-10 | 452633 | 7.95E-05 | 35.99984093 |
| Daytime napping | rs224111 | G | A | 0.612 | 0.008 | 0.001 | 1.60E-10 | 452633 | 0.000141375 | 63.99971721 |
| Daytime napping | rs1001817 | C | T | 0.507 | 0.008 | 0.001 | 1.70E-10 | 452633 | 0.000141375 | 63.99971721 |
| Daytime napping | rs10835420 | T | A | 0.751 | 0.009 | 0.001 | 1.70E-10 | 452633 | 0.000178921 | 80.99964209 |
| Daytime napping | rs2370926 | T | C | 0.634 | 0.008 | 0.001 | 1.70E-10 | 452633 | 0.000141375 | 63.99971721 |
| Daytime napping | rs1883048 | C | T | 0.524 | 0.008 | 0.001 | 1.80E-10 | 452633 | 0.000141375 | 63.99971721 |
| Daytime napping | rs12657723 | T | C | 0.322 | 0.008 | 0.001 | 2.00E-10 | 452633 | 0.000141375 | 63.99971721 |
| Daytime napping | rs6452787 | A | G | 0.536 | 0.008 | 0.001 | 2.00E-10 | 452633 | 0.000141375 | 63.99971721 |
| Daytime napping | rs2099810 | A | G | 0.503 | 0.008 | 0.001 | 2.80E-10 | 452633 | 0.000141375 | 63.99971721 |
| Daytime napping | rs4983329 | A | C | 0.556 | 0.008 | 0.001 | 3.10E-10 | 452633 | 0.000141375 | 63.99971721 |
| Daytime napping | rs17049683 | G | A | 0.333 | 0.008 | 0.001 | 4.10E-10 | 452633 | 0.000141375 | 63.99971721 |
| Daytime napping | rs9998136 | G | C | 0.747 | 0.009 | 0.001 | 4.40E-10 | 452633 | 0.000178921 | 80.99964209 |
| Daytime napping | rs60920123 | G | A | 0.567 | 0.008 | 0.001 | 4.50E-10 | 452633 | 0.000141375 | 63.99971721 |
| Daytime napping | rs1931175 | G | C | 0.384 | 0.008 | 0.001 | 4.60E-10 | 452633 | 0.000141375 | 63.99971721 |
| Daytime napping | rs285815 | T | A | 0.456 | 0.008 | 0.001 | 5.80E-10 | 452633 | 0.000141375 | 63.99971721 |
| Daytime napping | rs271057 | C | T | 0.248 | 0.009 | 0.001 | 6.50E-10 | 452633 | 0.000178921 | 80.99964209 |
| Daytime napping | rs13023587 | C | G | 0.49 | 0.007 | 0.001 | 6.50E-10 | 452633 | 0.000108244 | 48.99978349 |
| Daytime napping | rs351776 | C | A | 0.55 | 0.008 | 0.001 | 8.40E-10 | 452633 | 0.000141375 | 63.99971721 |
| Daytime napping | rs10257273 | A | T | 0.851 | 0.011 | 0.002 | 8.90E-10 | 452633 | 6.68E-05 | 30.24986634 |
| Daytime napping | rs9389556 | G | C | 0.261 | 0.008 | 0.001 | 9.70E-10 | 452633 | 0.000141375 | 63.99971721 |
| Daytime napping | rs113960908 | G | G | 0.227 | 0.009 | 0.001 | 1.00E-09 | 452633 | 0.000178921 | 80.99964209 |
| Daytime napping | rs1415218 | T | C | 0.281 | 0.008 | 0.001 | 1.20E-09 | 452633 | 0.000141375 | 63.99971721 |
| Daytime napping | rs2417268 | T | A | 0.44 | 0.008 | 0.001 | 1.20E-09 | 452633 | 0.000141375 | 63.99971721 |
| Daytime napping | rs34262487 | C | A | 0.928 | 0.015 | 0.002 | 1.20E-09 | 452633 | 0.000124257 | 56.24975145 |
| Daytime napping | rs971415 | A | G | 0.878 | 0.011 | 0.002 | 1.20E-09 | 452633 | 6.68E-05 | 30.24986634 |
| Daytime napping | rs77154532 | A | G | 0.642 | 0.008 | 0.001 | 1.40E-09 | 452633 | 0.000141375 | 63.99971721 |
| Daytime napping | rs301817 | A | C | 0.59 | 0.007 | 0.001 | 1.60E-09 | 452633 | 0.000108244 | 48.99978349 |
| Daytime napping | rs11967137 | A | G | 0.806 | 0.009 | 0.002 | 1.70E-09 | 452633 | 4.47E-05 | 20.24991052 |
| Daytime napping | rs17265513 | C | T | 0.199 | 0.009 | 0.002 | 2.00E-09 | 452633 | 4.47E-05 | 20.24991052 |
| Daytime napping | rs4692709 | C | T | 0.455 | 0.007 | 0.001 | 2.40E-09 | 452633 | 0.000108244 | 48.99978349 |
| Daytime napping | rs113493369 | C | A | 0.53 | 0.007 | 0.001 | 2.80E-09 | 452633 | 0.000108244 | 48.99978349 |
| Daytime napping | rs1518394 | G | A | 0.605 | 0.007 | 0.001 | 2.80E-09 | 452633 | 0.000108244 | 48.99978349 |
| Daytime napping | rs528301822 | T | A | 0.287 | 0.008 | 0.001 | 2.80E-09 | 452633 | 0.000141375 | 63.99971721 |
| Daytime napping | rs10811438 | G | C | 0.607 | 0.007 | 0.001 | 3.20E-09 | 452633 | 0.000108244 | 48.99978349 |
| Daytime napping | rs1843815 | T | A | 0.546 | 0.007 | 0.001 | 3.30E-09 | 452633 | 0.000108244 | 48.99978349 |
| Daytime napping | rs9309116 | T | C | 0.653 | 0.007 | 0.001 | 3.90E-09 | 452633 | 0.000108244 | 48.99978349 |
| Daytime napping | rs9883093 | G | T | 0.633 | 0.007 | 0.001 | 4.50E-09 | 452633 | 0.000108244 | 48.99978349 |
| Daytime napping | rs9939355 | C | T | 0.442 | 0.007 | 0.001 | 4.50E-09 | 452633 | 0.000108244 | 48.99978349 |
| Daytime napping | rs910187 | G | A | 0.626 | 0.007 | 0.001 | 4.90E-09 | 452633 | 0.000108244 | 48.99978349 |
| Daytime napping | rs12346996 | T | C | 0.272 | 0.008 | 0.001 | 5.00E-09 | 452633 | 0.000141375 | 63.99971721 |
| Daytime napping | rs11071755 | G | A | 0.575 | 0.007 | 0.001 | 5.20E-09 | 452633 | 0.000108244 | 48.99978349 |
| Daytime napping | rs12031519 | A | G | 0.888 | 0.011 | 0.002 | 5.50E-09 | 452633 | 6.68E-05 | 30.24986634 |
| Daytime napping | rs6663012 | T | G | 0.379 | 0.007 | 0.001 | 5.50E-09 | 452633 | 0.000108244 | 48.99978349 |
| Daytime napping | rs388016 | A | G | 0.667 | 0.007 | 0.001 | 6.10E-09 | 452633 | 0.000108244 | 48.99978349 |
| Daytime napping | rs2943023 | C | T | 0.58 | 0.007 | 0.001 | 7.40E-09 | 452633 | 0.000108244 | 48.99978349 |
| Daytime napping | rs35127490 | C | C | 0.438 | 0.007 | 0.001 | 8.30E-09 | 452633 | 0.000108244 | 48.99978349 |
| Daytime napping | rs62189006 | A | G | 0.907 | 0.012 | 0.002 | 8.30E-09 | 452633 | 7.95E-05 | 35.99984093 |
| Daytime napping | rs9460110 | C | T | 0.37 | 0.007 | 0.001 | 8.40E-09 | 452633 | 0.000108244 | 48.99978349 |
| Daytime napping | rs3986805 | G | A | 0.415 | 0.007 | 0.001 | 8.70E-09 | 452633 | 0.000108244 | 48.99978349 |
| Daytime napping | rs2143792 | G | A | 0.568 | 0.007 | 0.001 | 9.10E-09 | 452633 | 0.000108244 | 48.99978349 |
| Daytime napping | rs10152428 | C | G | 0.73 | 0.008 | 0.001 | 1.10E-08 | 452633 | 0.000141375 | 63.99971721 |
| Daytime napping | rs11224896 | T | C | 0.89 | 0.011 | 0.002 | 1.10E-08 | 452633 | 6.68E-05 | 30.24986634 |
| Daytime napping | rs7422655 | C | T | 0.263 | 0.008 | 0.001 | 1.10E-08 | 452633 | 0.000141375 | 63.99971721 |
| Daytime napping | rs35144585 | T | A | 0.871 | 0.01 | 0.002 | 1.20E-08 | 452633 | 5.52E-05 | 24.99988954 |
| Daytime napping | rs10875606 | C | A | 0.316 | 0.007 | 0.001 | 1.30E-08 | 452633 | 0.000108244 | 48.99978349 |
| Daytime napping | rs56180058 | C | T | 0.839 | 0.009 | 0.002 | 1.30E-08 | 452633 | 4.47E-05 | 20.24991052 |
| Daytime napping | rs4357022 | G | T | 0.464 | 0.007 | 0.001 | 1.40E-08 | 452633 | 0.000108244 | 48.99978349 |
| Daytime napping | rs4604518 | G | A | 0.546 | 0.007 | 0.001 | 1.40E-08 | 452633 | 0.000108244 | 48.99978349 |
| Daytime napping | rs3732085 | C | A | 0.642 | 0.007 | 0.001 | 1.50E-08 | 452633 | 0.000108244 | 48.99978349 |
| Daytime napping | rs7814873 | C | T | 0.383 | 0.007 | 0.001 | 1.50E-08 | 452633 | 0.000108244 | 48.99978349 |
| Daytime napping | rs13263535 | G | T | 0.531 | 0.007 | 0.001 | 1.60E-08 | 452633 | 0.000108244 | 48.99978349 |
| Daytime napping | rs2836909 | G | A | 0.31 | 0.007 | 0.001 | 1.60E-08 | 452633 | 0.000108244 | 48.99978349 |
| Daytime napping | rs76824303 | A | C | 0.901 | 0.012 | 0.002 | 1.70E-08 | 452633 | 7.95E-05 | 35.99984093 |
| Daytime napping | rs112520848 | C | G | 0.386 | 0.007 | 0.001 | 1.80E-08 | 452633 | 0.000108244 | 48.99978349 |
| Daytime napping | rs253666 | A | G | 0.765 | 0.008 | 0.001 | 1.80E-08 | 452633 | 0.000141375 | 63.99971721 |
| Daytime napping | rs17502738 | T | C | 0.804 | 0.009 | 0.002 | 2.00E-08 | 452633 | 4.47E-05 | 20.24991052 |
| Daytime napping | rs12614085 | C | T | 0.09 | 0.012 | 0.002 | 2.00E-08 | 452633 | 7.95E-05 | 35.99984093 |
| Daytime napping | rs3810484 | A | G | 0.556 | 0.007 | 0.001 | 2.20E-08 | 452633 | 0.000108244 | 48.99978349 |
| Daytime napping | rs2059639 | C | T | 0.479 | 0.007 | 0.001 | 2.40E-08 | 452633 | 0.000108244 | 48.99978349 |
| Daytime napping | rs62560863 | T | C | 0.1 | 0.011 | 0.002 | 2.50E-08 | 452633 | 6.68E-05 | 30.24986634 |
| Daytime napping | rs11383197 | A | A | 0.675 | 0.007 | 0.001 | 2.70E-08 | 452633 | 0.000108244 | 48.99978349 |
| Daytime napping | rs10639111 | T | T | 0.78 | 0.008 | 0.002 | 2.90E-08 | 452633 | 3.53E-05 | 15.9999293 |
| Daytime napping | rs189489 | C | G | 0.788 | 0.008 | 0.001 | 3.00E-08 | 452633 | 0.000141375 | 63.99971721 |
| Daytime napping | rs2699869 | A | C | 0.454 | 0.007 | 0.001 | 3.10E-08 | 452633 | 0.000108244 | 48.99978349 |
| Daytime napping | rs936944 | G | A | 0.162 | 0.009 | 0.002 | 3.20E-08 | 452633 | 4.47E-05 | 20.24991052 |
| Daytime napping | rs2893323 | A | G | 0.354 | 0.007 | 0.001 | 3.30E-08 | 452633 | 0.000108244 | 48.99978349 |
| Daytime napping | rs35851551 | A | G | 0.898 | 0.011 | 0.002 | 3.50E-08 | 452633 | 6.68E-05 | 30.24986634 |
| Daytime napping | rs927184 | A | T | 0.66 | 0.007 | 0.001 | 3.50E-08 | 452633 | 0.000108244 | 48.99978349 |
| Daytime napping | rs11502903 | A | G | 0.708 | 0.008 | 0.001 | 3.60E-08 | 452633 | 0.000141375 | 63.99971721 |
| Daytime napping | rs3943782 | G | A | 0.37 | 0.007 | 0.001 | 3.60E-08 | 452633 | 0.000108244 | 48.99978349 |
| Daytime napping | rs34728579 | C | T | 0.2 | 0.008 | 0.002 | 3.70E-08 | 452633 | 3.53E-05 | 15.9999293 |
| Daytime napping | rs2084839 | G | T | 0.423 | 0.007 | 0.001 | 3.80E-08 | 452633 | 0.000108244 | 48.99978349 |
| Daytime napping | rs73817091 | T | C | 0.042 | 0.017 | 0.003 | 3.80E-08 | 452633 | 7.09E-05 | 32.11096923 |
| Daytime napping | rs1941182 | A | C | 0.418 | 0.007 | 0.001 | 4.10E-08 | 452633 | 0.000108244 | 48.99978349 |
| Daytime napping | rs2284015 | G | C | 0.259 | 0.008 | 0.001 | 4.10E-08 | 452633 | 0.000141375 | 63.99971721 |
| Daytime napping | rs140506252 | A | T | 0.978 | 0.023 | 0.004 | 4.30E-08 | 452633 | 7.30E-05 | 33.06235391 |
| Daytime napping | rs4356873 | C | T | 0.24 | 0.008 | 0.001 | 4.50E-08 | 452633 | 0.000141375 | 63.99971721 |
| Daytime sleepiness | rs2787120 | G | A | 0.19 | 0.008 | 0.001 | 2.00E-08 | 452633 | 0.000141375 | 63.99971721 |
| Daytime sleepiness | rs12140153 | T | G | 0.067 | 0.017 | 0.002 | 2.80E-20 | 452071 | 0.000159794 | 72.24968036 |
| Daytime sleepiness | rs17131124 | C | G | 0.885 | 0.011 | 0.002 | 1.70E-09 | 452071 | 6.69E-05 | 30.24986617 |
| Daytime sleepiness | rs57746981 | T | C | 0.384 | 0.007 | 0.001 | 2.20E-10 | 452071 | 0.000108378 | 48.99978322 |
| Daytime sleepiness | rs825127 | G | T | 0.473 | 0.006 | 0.001 | 9.50E-09 | 452071 | 7.96E-05 | 35.99984073 |
| Daytime sleepiness | rs4665972 | C | T | 0.585 | 0.007 | 0.001 | 3.90E-10 | 452071 | 0.000108378 | 48.99978322 |
| Daytime sleepiness | rs7598712 | T | G | 0.462 | 0.006 | 0.001 | 2.20E-08 | 452071 | 7.96E-05 | 35.99984073 |
| Daytime sleepiness | rs6741951 | A | G | 0.267 | 0.007 | 0.001 | 2.70E-09 | 452071 | 0.000108378 | 48.99978322 |
| Daytime sleepiness | rs11123962 | T | G | 0.51 | 0.008 | 0.001 | 7.50E-15 | 452071 | 0.000141551 | 63.99971686 |
| Daytime sleepiness | rs9712275 | C | T | 0.438 | 0.006 | 0.001 | 1.30E-08 | 452071 | 7.96E-05 | 35.99984073 |
| Daytime sleepiness | rs7607363 | A | G | 0.577 | 0.006 | 0.001 | 8.00E-09 | 452071 | 7.96E-05 | 35.99984073 |
| Daytime sleepiness | rs13010456 | G | A | 0.365 | 0.008 | 0.001 | 2.10E-13 | 452071 | 0.000141551 | 63.99971686 |
| Daytime sleepiness | rs13097760 | A | C | 0.606 | 0.006 | 0.001 | 3.20E-08 | 452071 | 7.96E-05 | 35.99984073 |
| Daytime sleepiness | rs34478464 | C | T | 0.791 | 0.009 | 0.001 | 5.80E-11 | 452071 | 0.000179143 | 80.99964165 |
| Daytime sleepiness | rs960986 | T | C | 0.365 | 0.007 | 0.001 | 1.50E-11 | 452071 | 0.000108378 | 48.99978322 |
| Daytime sleepiness | rs843372 | T | C | 0.791 | 0.008 | 0.001 | 2.20E-11 | 452071 | 0.000141551 | 63.99971686 |
| Daytime sleepiness | rs11942333 | G | A | 0.659 | 0.006 | 0.001 | 3.80E-08 | 452071 | 7.96E-05 | 35.99984073 |
| Daytime sleepiness | rs13135092 | A | G | 0.915 | 0.01 | 0.002 | 3.10E-08 | 452071 | 5.53E-05 | 24.9998894 |
| Daytime sleepiness | rs6897863 | C | A | 0.406 | 0.006 | 0.001 | 7.60E-10 | 452071 | 7.96E-05 | 35.99984073 |
| Daytime sleepiness | rs12153518 | G | A | 0.495 | 0.007 | 0.001 | 6.80E-11 | 452071 | 0.000108378 | 48.99978322 |
| Daytime sleepiness | rs6923811 | C | T | 0.331 | 0.007 | 0.001 | 9.10E-10 | 452071 | 0.000108378 | 48.99978322 |
| Daytime sleepiness | rs55960940 | C | T | 0.175 | 0.008 | 0.001 | 2.00E-08 | 452071 | 0.000141551 | 63.99971686 |
| Daytime sleepiness | rs3122170 | A | C | 0.786 | 0.01 | 0.001 | 5.60E-15 | 452071 | 0.000221155 | 99.99955759 |
| Daytime sleepiness | rs62519825 | T | C | 0.852 | 0.009 | 0.002 | 3.80E-09 | 452071 | 4.48E-05 | 20.24991041 |
| Daytime sleepiness | rs285793 | A | G | 0.543 | 0.007 | 0.001 | 7.90E-11 | 452071 | 0.000108378 | 48.99978322 |
| Daytime sleepiness | rs7837226 | A | G | 0.468 | 0.006 | 0.001 | 2.00E-08 | 452071 | 7.96E-05 | 35.99984073 |
| Daytime sleepiness | rs55818482 | T | C | 0.801 | 0.01 | 0.001 | 1.40E-14 | 452071 | 0.000221155 | 99.99955759 |
| Daytime sleepiness | rs1566362 | C | T | 0.353 | 0.006 | 0.001 | 3.80E-09 | 452071 | 7.96E-05 | 35.99984073 |
| Daytime sleepiness | rs7476897 | A | G | 0.289 | 0.007 | 0.001 | 2.70E-11 | 452071 | 0.000108378 | 48.99978322 |
| Daytime sleepiness | rs4765939 | G | C | 0.602 | 0.006 | 0.001 | 2.00E-09 | 452071 | 7.96E-05 | 35.99984073 |
| Daytime sleepiness | rs1846644 | T | C | 0.563 | 0.011 | 0.001 | 2.50E-27 | 452071 | 0.000267585 | 120.9994647 |
| Daytime sleepiness | rs8015449 | G | A | 0.42 | 0.006 | 0.001 | 1.90E-09 | 452071 | 7.96E-05 | 35.99984073 |
| Daytime sleepiness | rs17356118 | A | G | 0.773 | 0.008 | 0.001 | 2.60E-10 | 452071 | 0.000141551 | 63.99971686 |
| Daytime sleepiness | rs886114 | T | C | 0.642 | 0.006 | 0.001 | 1.90E-08 | 452071 | 7.96E-05 | 35.99984073 |
| Daytime sleepiness | rs11078398 | A | G | 0.333 | 0.008 | 0.001 | 7.10E-10 | 452071 | 0.000141551 | 63.99971686 |
| Daytime sleepiness | rs62066119 | T | C | 0.241 | 0.008 | 0.001 | 7.30E-12 | 452071 | 0.000141551 | 63.99971686 |
| Daytime sleepiness | rs2048522 | T | A | 0.46 | 0.006 | 0.001 | 3.50E-08 | 452071 | 7.96E-05 | 35.99984073 |
| Snoring | rs12119849 | G | A | 0.083 | -0.012 | 0.002 | 4.10E-11 | 408317 | 8.82E-05 | 35.99982367 |
| Snoring | 1:50819256_CA_C | CA | C | 0.492 | 0.006 | 0.001 | 3.50E-09 | 408317 | 8.82E-05 | 35.99982367 |
| Snoring | rs80093081 | T | G | 0.292 | 0.006 | 0.001 | 1.80E-08 | 408317 | 8.82E-05 | 35.99982367 |
| Snoring | 1:87773720_CT_C | CT | C | 0.338 | 0.006 | 0.001 | 3.00E-08 | 408317 | 8.82E-05 | 35.99982367 |
| Snoring | rs61597598 | G | A | 0.116 | -0.012 | 0.002 | 5.10E-15 | 408317 | 8.82E-05 | 35.99982367 |
| Snoring | rs773118143 | ACTCTGTAT | A | 0.252 | -0.006 | 0.001 | 2.90E-08 | 408317 | 8.82E-05 | 35.99982367 |
| Snoring | rs74936745 | AC | A | 0.444 | 0.006 | 0.001 | 4.00E-10 | 408317 | 8.82E-05 | 35.99982367 |
| Snoring | rs202110996 | A | ATT | 0.394 | 0.006 | 0.001 | 4.60E-09 | 408317 | 8.82E-05 | 35.99982367 |
| Snoring | rs145367119 | C | T | 0.431 | 0.006 | 0.001 | 1.20E-08 | 408317 | 8.82E-05 | 35.99982367 |
| Snoring | rs34811474 | G | A | 0.217 | 0.008 | 0.001 | 1.30E-10 | 408317 | 0.000156716 | 63.99968652 |
| Snoring | rs2307111 | T | C | 0.396 | 0.008 | 0.001 | 4.80E-13 | 408317 | 0.000156716 | 63.99968652 |
| Snoring | rs4976269 | G | A | 0.341 | 0.007 | 0.001 | 8.60E-10 | 408317 | 0.00011999 | 48.99975999 |
| Snoring | rs34732995 | C | CTA | 0.476 | 0.006 | 0.001 | 1.70E-08 | 408317 | 8.82E-05 | 35.99982367 |
| Snoring | rs17060460 | A | G | 0.235 | -0.007 | 0.001 | 1.40E-08 | 408317 | 0.00011999 | 48.99975999 |
| Snoring | rs947612 | G | A | 0.229 | 0.007 | 0.001 | 1.50E-08 | 408317 | 0.00011999 | 48.99975999 |
| Snoring | rs2207944 | T | C | 0.457 | -0.006 | 0.001 | 2.00E-08 | 408317 | 8.82E-05 | 35.99982367 |
| Snoring | rs17151229 | G | C | 0.354 | -0.007 | 0.001 | 1.90E-09 | 408317 | 0.00011999 | 48.99975999 |
| Snoring | rs13251292 | A | G | 0.415 | -0.007 | 0.001 | 4.30E-12 | 408317 | 0.00011999 | 48.99975999 |
| Snoring | rs7829639 | A | G | 0.297 | -0.007 | 0.001 | 1.40E-10 | 408317 | 0.00011999 | 48.99975999 |
| Snoring | rs4744369 | T | A | 0.396 | -0.006 | 0.001 | 4.00E-08 | 408317 | 8.82E-05 | 35.99982367 |
| Snoring | rs725861 | A | G | 0.192 | -0.009 | 0.001 | 1.00E-11 | 408317 | 0.000198336 | 80.99960325 |
| Snoring | rs11018488 | A | T | 0.364 | 0.007 | 0.001 | 5.30E-10 | 408317 | 0.00011999 | 48.99975999 |
| Snoring | rs2049045 | G | C | 0.191 | 0.008 | 0.001 | 8.80E-10 | 408317 | 0.000156716 | 63.99968652 |
| Snoring | rs10878269 | C | T | 0.35 | -0.009 | 0.001 | 2.30E-16 | 408317 | 0.000198336 | 80.99960325 |
| Snoring | 12:57088077_CA_C | CA | C | 0.305 | 0.007 | 0.001 | 3.00E-09 | 408317 | 0.00011999 | 48.99975999 |
| Snoring | rs592333 | A | G | 0.442 | -0.009 | 0.001 | 1.00E-17 | 408317 | 0.000198336 | 80.99960325 |
| Snoring | rs12429765 | A | G | 0.493 | 0.007 | 0.001 | 6.20E-11 | 408317 | 0.00011999 | 48.99975999 |
| Snoring | rs9583546 | G | C | 0.369 | -0.006 | 0.001 | 4.00E-08 | 408317 | 8.82E-05 | 35.99982367 |
| Snoring | rs2664299 | T | C | 0.415 | 0.008 | 0.001 | 1.10E-12 | 408317 | 0.000156716 | 63.99968652 |
| Snoring | rs796856741 | G | GT | 0.443 | -0.007 | 0.001 | 4.70E-11 | 408317 | 0.00011999 | 48.99975999 |
| Snoring | rs59502288 | G | GTCATCCA | 0.365 | -0.007 | 0.001 | 9.10E-10 | 408317 | 0.00011999 | 48.99975999 |
| Snoring | rs57222984 | A | G | 0.265 | -0.008 | 0.001 | 5.40E-12 | 408317 | 0.000156716 | 63.99968652 |
| Snoring | rs180107 | A | T | 0.37 | -0.007 | 0.001 | 2.10E-10 | 408317 | 0.00011999 | 48.99975999 |
| Snoring | rs11409890 | T | TA | 0.482 | 0.007 | 0.001 | 2.20E-10 | 408317 | 0.00011999 | 48.99975999 |
| Snoring | rs8069947 | C | T | 0.488 | 0.007 | 0.001 | 2.80E-10 | 408317 | 0.00011999 | 48.99975999 |
| Snoring | rs9900496 | T | C | 0.317 | -0.007 | 0.001 | 1.80E-09 | 408317 | 0.00011999 | 48.99975999 |
| Snoring | rs227727 | A | T | 0.45 | -0.006 | 0.001 | 1.40E-08 | 408317 | 8.82E-05 | 35.99982367 |
| Snoring | rs4987719 | C | T | 0.028 | -0.016 | 0.003 | 3.50E-08 | 408317 | 6.97E-05 | 28.44430512 |
| Snoring | rs8108822 | C | T | 0.102 | 0.011 | 0.002 | 6.20E-10 | 408317 | 7.41E-05 | 30.24985183 |
| Snoring | rs6054427 | G | A | 0.378 | -0.006 | 0.001 | 4.00E-09 | 408317 | 8.82E-05 | 35.99982367 |
| Snoring | rs6099273 | C | T | 0.235 | -0.007 | 0.001 | 2.60E-08 | 408317 | 0.00011999 | 48.99975999 |
|  |  |  |  |  |  |  |  |  |  |  |

# Table S2. Horizontal pleiotropy of Mendelian randomization results

| **outcome** | **exposure** | **egger_intercept** | **se** | **pval** |
| --- | --- | --- | --- | --- |
| Psoriasis | Frequent insomnia | 0.003269546 | 0.006064482 | 0.592643608 |
| Psoriasis | Daytime napping | -0.008032119 | 0.005752818 | 0.165683705 |
| Psoriasis | Sleep duration | 0.005394818 | 0.008547544 | 0.52999531 |
| Psoriasis | Chronotype | 0.006965514 | 0.004501165 | 0.124018608 |
| Psoriasis | Long sleep duration | -0.023690468 | 0.023137162 | 0.352835841 |
| Psoriasis | Daytime sleepiness | 0.017014486 | 0.014632247 | 0.253247694 |
| Psoriasis | Short sleep duration | -0.062945127 | 0.031144007 | 0.055058298 |
| Psoriasis | Snoring | 0.021047406 | 0.022129214 | 0.349983581 |
| Acne | Chronotype | 0.007638512 | 0.006643805 | 0.252233719 |
| Acne | Short sleep duration | -0.022590213 | 0.026926731 | 0.410131929 |
| Acne | Frequent insomnia | 0.015814013 | 0.010057879 | 0.123384636 |
| Acne | Snoring | 0.0440185 | 0.028839403 | 0.138557585 |
| Acne | Daytime napping | -0.004989712 | 0.009567149 | 0.603116851 |
| Acne | Sleep duration | 0.028374277 | 0.012706013 | 0.028738847 |
| Acne | Long sleep duration | 0.019646597 | 0.037747797 | 0.624953039 |
| Acne | Daytime sleepiness | 0.006427747 | 0.019690365 | 0.746151946 |
| Urticaria | Frequent insomnia | 0.012331303 | 0.006280086 | 0.056224488 |
| Urticaria | Short sleep duration | 0.015817608 | 0.016817037 | 0.356699439 |
| Urticaria | Sleep duration | -0.002656898 | 0.006405845 | 0.679584888 |
| Urticaria | Chronotype | -0.000146279 | 0.004280321 | 0.972786741 |
| Urticaria | Daytime sleepiness | 0.010005193 | 0.010251059 | 0.336157682 |
| Urticaria | Daytime napping | -0.00595222 | 0.00523808 | 0.258478612 |
| Urticaria | Snoring | 0.007838249 | 0.014686462 | 0.597911967 |
| Urticaria | Long sleep duration | -0.000508052 | 0.018006237 | 0.978581961 |
| Atopic dermatitis | Daytime napping | -0.002674183 | 0.004813432 | 0.579723528 |
| Atopic dermatitis | Sleep duration | -0.000104928 | 0.005705765 | 0.98538025 |
| Atopic dermatitis | Snoring | -0.008578526 | 0.010969912 | 0.441015974 |
| Atopic dermatitis | Chronotype | -0.000112612 | 0.003155255 | 0.971580469 |
| Atopic dermatitis | Daytime sleepiness | 0.007531079 | 0.008794229 | 0.397971311 |
| Atopic dermatitis | Short sleep duration | -0.001414597 | 0.010844729 | 0.897351717 |
| Atopic dermatitis | Frequent insomnia | 0.009278568 | 0.004521938 | 0.046447578 |
| Atopic dermatitis | Long sleep duration | 0.010012548 | 0.031087748 | 0.760426971 |

# Table S3. Heterogeneity of Mendelian randomization results

| **outcome** | **exposure** | **method** | **Q** | **Q_df** | **Q_pval** |
| --- | --- | --- | --- | --- | --- |
| Psoriasis | Frequent insomnia | MR Egger | 33.88727626 | 42 | 0.809359004 |
| Psoriasis | Frequent insomnia | Inverse variance weighted | 34.17793767 | 43 | 0.82950081 |
| Psoriasis | Daytime napping | MR Egger | 126.9602535 | 102 | 0.047632337 |
| Psoriasis | Daytime napping | Inverse variance weighted | 129.3866772 | 103 | 0.040321782 |
| Psoriasis | Sleep duration | MR Egger | 114.2761216 | 70 | 0.000661323 |
| Psoriasis | Sleep duration | Inverse variance weighted | 114.9264434 | 71 | 0.00075397 |
| Psoriasis | Chronotype | MR Egger | 208.1671028 | 139 | 0.000132042 |
| Psoriasis | Chronotype | Inverse variance weighted | 211.7534616 | 140 | 8.61632E-05 |
| Psoriasis | Long sleep duration | MR Egger | 7.512911577 | 5 | 0.185202054 |
| Psoriasis | Long sleep duration | Inverse variance weighted | 9.088219176 | 6 | 0.168677139 |
| Psoriasis | Daytime sleepiness | MR Egger | 60.70703797 | 33 | 0.002306484 |
| Psoriasis | Daytime sleepiness | Inverse variance weighted | 63.1944099 | 34 | 0.00171804 |
| Psoriasis | Short sleep duration | MR Egger | 131.4865761 | 23 | 3.42064E-17 |
| Psoriasis | Short sleep duration | Inverse variance weighted | 154.838832 | 24 | 4.15793E-21 |
| Psoriasis | Snoring | MR Egger | 70.43091299 | 27 | 9.73441E-06 |
| Psoriasis | Snoring | Inverse variance weighted | 72.79065614 | 28 | 7.51343E-06 |
| Acne | Chronotype | MR Egger | 163.2118815 | 139 | 0.078546592 |
| Acne | Chronotype | Inverse variance weighted | 164.7639855 | 140 | 0.074934181 |
| Acne | Short sleep duration | MR Egger | 30.53193726 | 23 | 0.134732587 |
| Acne | Short sleep duration | Inverse variance weighted | 31.46626644 | 24 | 0.140788694 |
| Acne | Frequent insomnia | MR Egger | 34.52160622 | 42 | 0.787036729 |
| Acne | Frequent insomnia | Inverse variance weighted | 36.99373695 | 43 | 0.728311426 |
| Acne | Snoring | MR Egger | 43.1612709 | 27 | 0.02519473 |
| Acne | Snoring | Inverse variance weighted | 46.88543144 | 28 | 0.014085665 |
| Acne | Daytime napping | MR Egger | 126.8886617 | 102 | 0.048064084 |
| Acne | Daytime napping | Inverse variance weighted | 127.2270447 | 103 | 0.052950914 |
| Acne | Sleep duration | MR Egger | 90.73667495 | 70 | 0.048508998 |
| Acne | Sleep duration | Inverse variance weighted | 97.20089101 | 71 | 0.021217675 |
| Acne | Long sleep duration | MR Egger | 7.348230837 | 5 | 0.196003134 |
| Acne | Long sleep duration | Inverse variance weighted | 7.746341889 | 6 | 0.257282203 |
| Acne | Daytime sleepiness | MR Egger | 40.0175573 | 33 | 0.186727955 |
| Acne | Daytime sleepiness | Inverse variance weighted | 40.14678231 | 34 | 0.216370763 |
| Atopic dermatitis | Daytime napping | MR Egger | 201.9809398 | 102 | 1.45E-08 |
| Atopic dermatitis | Daytime napping | Inverse variance weighted | 202.5921391 | 103 | 1.76E-08 |
| Atopic dermatitis | Sleep duration | MR Egger | 115.0053666 | 70 | 0.000565684 |
| Atopic dermatitis | Sleep duration | Inverse variance weighted | 115.0059223 | 71 | 0.000741435 |
| Atopic dermatitis | Snoring | MR Egger | 39.34504119 | 27 | 0.058923298 |
| Atopic dermatitis | Snoring | Inverse variance weighted | 40.23617999 | 28 | 0.062991059 |
| Atopic dermatitis | Chronotype | MR Egger | 232.1231675 | 139 | 1.23E-06 |
| Atopic dermatitis | Chronotype | Inverse variance weighted | 232.1252947 | 140 | 1.60E-06 |
| Atopic dermatitis | Daytime sleepiness | MR Egger | 50.30852964 | 33 | 0.02735112 |
| Atopic dermatitis | Daytime sleepiness | Inverse variance weighted | 51.42654184 | 34 | 0.028045292 |
| Atopic dermatitis | Short sleep duration | MR Egger | 31.11524696 | 23 | 0.119987996 |
| Atopic dermatitis | Short sleep duration | Inverse variance weighted | 31.13826528 | 24 | 0.149835884 |
| Atopic dermatitis | Frequent insomnia | MR Egger | 53.32897812 | 42 | 0.112942067 |
| Atopic dermatitis | Frequent insomnia | Inverse variance weighted | 58.67494936 | 43 | 0.055931584 |
| Atopic dermatitis | Long sleep duration | MR Egger | 31.06768352 | 5 | 9.08E-06 |
| Atopic dermatitis | Long sleep duration | Inverse variance weighted | 31.71222312 | 6 | 1.85E-05 |
| Urticaria | Frequent insomnia | MR Egger | 49.59666928 | 42 | 0.196173918 |
| Urticaria | Frequent insomnia | Inverse variance weighted | 54.14958955 | 43 | 0.118552115 |
| Urticaria | Short sleep duration | MR Egger | 34.98308129 | 23 | 0.052217069 |
| Urticaria | Short sleep duration | Inverse variance weighted | 36.32867166 | 24 | 0.050984368 |
| Urticaria | Sleep duration | MR Egger | 67.3810048 | 70 | 0.566554486 |
| Urticaria | Sleep duration | Inverse variance weighted | 67.55303192 | 71 | 0.594008856 |
| Urticaria | Chronotype | MR Egger | 206.4091266 | 139 | 0.000180476 |
| Urticaria | Chronotype | Inverse variance weighted | 206.410861 | 140 | 0.000223121 |
| Urticaria | Daytime sleepiness | MR Egger | 32.12045983 | 33 | 0.510722766 |
| Urticaria | Daytime sleepiness | Inverse variance weighted | 33.07306624 | 34 | 0.51288552 |
| Urticaria | Daytime napping | MR Egger | 115.7279105 | 102 | 0.166691944 |
| Urticaria | Daytime napping | Inverse variance weighted | 117.1929578 | 103 | 0.160417536 |
| Urticaria | Snoring | MR Egger | 34.01796729 | 27 | 0.165525706 |
| Urticaria | Snoring | Inverse variance weighted | 34.37684655 | 28 | 0.188739984 |
| Urticaria | Long sleep duration | MR Egger | 2.939328033 | 5 | 0.709339294 |
| Urticaria | Long sleep duration | Inverse variance weighted | 2.940124137 | 6 | 0.816323519 |
